# Supplementary material for: Dissection of genetic architecture for tiller angle in rice ( Oryza sativa . L) by multiple genome-wide association analyses
Source: PeerJ journal article supplement (doi:10.7717/peerj.12674), 2022-03-10
Supplement: S-Table-1.docx [file S-Table-1.docx]

| Supplementary Table 1: Information of tillage angle for genotypes used in the study, their subpopulation and respective haplotype in *Tac-1* | | | | | | | | | | | | | |
| --- | --- | --- | --- | --- | --- | --- | --- | --- | --- | --- | --- | --- | --- |
| Sr. no. | Genotype | *Sub- population* | *Tac1 Haplotype* | Block 1 | | | | | Block 2 | | | | |
| R1 | R2 | R3 | R4 | R5 | R1 | R2 | R3 | R4 | R5 |
| 1 | G1 | *Japonica* | Hap-1 | 30 | 32 | 32 | 32 | 40 | 48 | 47 | 52 | 40 | 50 |
| 2 | G2 | *Japonica* | Hap-1 | 34 | 30 | 31 | 31 | 36 | *-* | *-* | *-* | *-* | *-* |
| 3 | G3 | *Indica* | Hap-1 | 35 | 32 | 42 | 42 | 35 | 44 | 35 | 55 | 28 | 45 |
| 4 | G4 | *Japonica* | Hap-1 | 33 | 34 | 33 | 33 | 38 | 40 | 35 | 27 | 40 | 30 |
| 5 | G5 | *Indica* | Hap-1 | 34 | 37 | 25 | 25 | 41 | 28 | 25 | 30 | 35 | 26 |
| 6 | G6 | *Indica* | Hap-1 | 25 | 43 | 36 | 36 | 35 | 40 | 35 | 32 | 33 | 40 |
| 7 | G7 | *Japonica* | Hap-1 | 33 | 48 | 33 | 33 | 41 | 40 | 33 | 40 | 30 | 35 |
| 8 | G8 | *Indica* | Hap-1 | 36 | 41 | 30 | 30 | 29 | 21 | 26 | 22 | 28 | 25 |
| 9 | G9 | *Indica* | Hap-4 | 40 | 35 | 38 | 38 | 36 | 25 | 32 | 31 | 35 | 34 |
| 10 | G10 | *Indica* | Hap-4 | 45 | 35 | 45 | 45 | 35 | 35 | 38 | 42 | 48 | 38 |
| 11 | G11 | *Japonica* | Hap-1 | 45 | 40 | 30 | 30 | 45 | 28 | 40 | 35 | 40 | 37 |
| 12 | G12 | *Japonica* | Hap-1 | 39 | 35 | 32 | 32 | 40 | *-* | *-* | *-* | *-* | *-* |
| 13 | G13 | *Indica* | Hap-1 | 40 | 50 | 45 | 45 | 35 | 23 | 25 | 38 | 42 | 25 |
| 14 | G14 | *Indica* | Hap-1 | 51 | 38 | 40 | 40 | 28 | 55 | 55 | 50 | 50 | 68 |
| 15 | G15 | *Japonica* | Hap-1 | 48 | 40 | 35 | 35 | 35 | 45 | 35 | 35 | 25 | 28 |
| 16 | G16 | *Japonica* | Hap-1 | 50 | 40 | 50 | 50 | 45 | 58 | 54 | 75 | 60 | 70 |
| 17 | G17 | *Indica* | Hap-4 | 38 | 36 | 45 | 45 | 50 | 23 | 30 | 35 | 25 | 40 |
| 18 | G18 | *Indica* | Hap-1 | 38 | 60 | 50 | 50 | 40 | 35 | 40 | 40 | 45 | 32 |
| 19 | G19 | *Japonica* | Hap-1 | 50 | 55 | 61 | 61 | 56 | 60 | 70 | 45 | 40 | 45 |
| 20 | G20 | *Indica* | Hap-4 | 70 | 72 | 52 | 52 | 52 | 55 | 70 | 70 | 65 | 75 |
| 21 | G21 | *Indica* | Hap-4 | 57 | 60 | 55 | 55 | 65 | 42 | 45 | 50 | 55 | 45 |
| 22 | G22 | *Indica* | Hap-4 | 55 | 30 | 42 | 42 | 60 | 35 | 30 | 28 | 38 | 40 |
| 23 | G23 | *Japonica* | Hap-4 | 58 | 48 | 48 | 48 | 42 | *-* | *-* | *-* | *-* | *-* |
| 24 | G24 | *Japonica* | Hap-4 | 35 | 25 | 35 | 35 | 25 | 31 | 33 | 31 | 28 | 30 |
| 25 | G25 | *Indica* | Hap-4 | 35 | 65 | 28 | 28 | 30 | 35 | 38 | 33 | 30 | 40 |
| 26 | G26 | *Japonica* | Hap-4 | 50 | 21 | 70 | 70 | 50 | 38 | 50 | 55 | 35 | 35 |
| 27 | G27 | *Indica* | Hap-4 | 21 | 50 | 18 | 18 | 21 | 21 | 15 | 21 | 18 | 17 |
| 28 | G28 | *Indica* | Hap-1 | 55 | 32 | 57 | 57 | 55 | 45 | 50 | 48 | 50 | 55 |
| 29 | G29 | *Indica* | Hap-4 | 32 | 41 | 35 | 35 | 45 | 32 | 32 | 38 | 32 | 32 |
| 30 | G30 | *Japonica* | Hap-4 | 40 | 47 | 40 | 40 | 38 | 25 | 31 | 35 | 32 | 38 |
| 31 | G31 | *Indica* | Hap-4 | 45 | 40 | 40 | 40 | 55 | 33 | 41 | 50 | 30 | 48 |
| 32 | G32 | *Indica* | Hap-1 | 30 | 34 | 32 | 32 | 33 | 35 | 35 | 35 | 32 | 28 |
| 33 | G33 | *Indica* | Hap-2 | 38 | 30 | 28 | 28 | 35 | *-* | *-* | *-* | *-* | *-* |
| 34 | G34 | *Indica* | Hap-1 | 34 | 40 | 45 | 45 | 30 | 27 | 28 | 27 | 24 | 23 |
| 35 | G35 | *Indica* | Hap-4 | 40 | 35 | 34 | 34 | 48 | 32 | 28 | 31 | 42 | 30 |
| 36 | G36 | *Japonica* | Hap-1 | 30 | 38 | 34 | 34 | 32 | 35 | 38 | 33 | 35 | 40 |
| 37 | G37 | *Japonica* | Hap-1 | 45 | 31 | 40 | 40 | 36 | 40 | 28 | 33 | 40 | 35 |
| 38 | G38 | *Indica* | Hap-4 | 44 | 30 | 31 | 31 | 33 | 38 | 39 | 33 | 39 | 38 |
| 39 | G39 | *Japonica* | Hap-1 | 45 | 35 | 38 | 38 | 35 | 30 | 40 | 45 | 35 | 38 |
| 40 | G40 | *Japonica* | Hap-1 | 40 | 41 | 34 | 34 | 35 | 40 | 44 | 45 | 45 | 40 |
| 41 | G41 | *Indica* | Hap-1 | 45 | 43 | 48 | 48 | 50 | *-* | *-* | *-* | *-* | *-* |
| 42 | G42 | *Indica* | Hap-1 | 40 | 37 | 33 | 33 | 40 | 43 | 38 | 30 | 35 | 40 |
| 43 | G43 | *Indica* | Hap-4 | 35 | 50 | 37 | 37 | 55 | 45 | 50 | 35 | 38 | 55 |
| 44 | G44 | *Japonica* | Hap-1 | 50 | 40 | 45 | 45 | 48 | 35 | 35 | 50 | 40 | 45 |
| 45 | G45 | *Indica* | Hap-1 | 44 | 38 | 38 | 38 | 38 | 55 | 45 | 55 | 54 | 52 |
| 46 | G46 | *Indica* | Hap-4 | 40 | 40 | 53 | 53 | 40 | 35 | 25 | 30 | 28 | 32 |
| 47 | G47 | *Japonica* | Hap-4 | 35 | 32 | 33 | 33 | 33 | 38 | 30 | 30 | 35 | 35 |
| 48 | G48 | *Japonica* | Hap-4 | 40 | 30 | 30 | 30 | 44 | 33 | 33 | 35 | 40 | 30 |
| 49 | G49 | *Indica* | Hap-4 | 30 | 30 | 34 | 34 | 36 | 28 | 27 | 30 | 25 | 31 |
| 50 | G50 | *Japonica* | Hap-4 | 42 | 38 | 40 | 40 | 38 | 35 | 34 | 30 | 35 | 40 |
| 51 | G51 | *Indica* | Hap-1 | 37 | 38 | 30 | 30 | 30 | 28 | 38 | 30 | 40 | 30 |
| 52 | G52 | *Indica* | Hap-1 | 21 | 30 | 37 | 37 | 25 | *-* | *-* | *-* | *-* | *-* |
| 53 | G53 | *Indica* | Hap-4 | 41 | 51 | 40 | 40 | 55 | 40 | 45 | 50 | 52 | 58 |
| 54 | G54 | *Indica* | Hap-1 | 40 | 35 | 35 | 35 | 37 | 35 | 45 | 40 | 32 | 35 |
| 55 | G55 | *Japonica* | Hap-4 | 55 | 50 | 45 | 45 | 51 | 50 | 33 | 35 | 45 | 47 |
| 56 | G56 | *Indica* | Hap-4 | 40 | 40 | 40 | 40 | 43 | 35 | 35 | 30 | 28 | 24 |
| 57 | G57 | *Indica* | Hap-4 | 55 | 55 | 50 | 50 | 54 | 55 | 75 | 65 | 55 | 58 |
| 58 | G58 | *Japonica* | Hap-4 | 26 | 25 | 28 | 28 | 30 | 34 | 30 | 30 | 36 | 38 |
| 59 | G59 | *Indica* | Hap-4 | 26 | 36 | 27 | 27 | 30 | 35 | 25 | 30 | 30 | 30 |
| 60 | G60 | *Indica* | Hap-4 | 40 | 48 | 50 | 50 | 36 | 33 | 28 | 30 | 40 | 42 |
| 61 | G61 | *Indica* | Hap-4 | 70 | 55 | 58 | 58 | 53 | 38 | 37 | 38 | 46 | 36 |
| 62 | G62 | *Japonica* | Hap-1 | 45 | 45 | 40 | 40 | 50 | *-* | *-* | *-* | *-* | *-* |
| 63 | G63 | *Indica* | Hap-4 | 38 | 37 | 36 | 36 | 42 | 38 | 30 | 38 | 42 | 38 |
| 64 | G64 | *Indica* | Hap-4 | 32 | 30 | 30 | 30 | 34 | 35 | 31 | 38 | 30 | 21 |
| 65 | G65 | *Indica* | Hap-4 | 48 | 55 | 50 | 50 | 43 | 42 | 30 | 50 | 45 | 40 |
| 66 | G66 | *Japonica* | Hap-1 | 40 | 43 | 45 | 45 | 55 | 40 | 30 | 36 | 36 | 35 |
| 67 | G67 | *Indica* | Hap-4 | 43 | 52 | 48 | 48 | 55 | *-* | *-* | *-* | *-* | *-* |
| 68 | G68 | *Indica* | Hap-4 | 40 | 35 | 33 | 33 | 40 | *-* | *-* | *-* | *-* | *-* |
| 69 | G69 | *Indica* | Hap-1 | 35 | 33 | 28 | 28 | 33 | 23 | 45 | 35 | 30 | 26 |
| 70 | G70 | *Indica* | Hap-4 | 38 | 35 | 48 | 48 | 55 | *-* | *-* | *-* | *-* | *-* |
| 71 | G71 | *Japonica* | Hap-4 | *-* | *-* | *-* | *-* | *-* | *-* | *-* | *-* | *-* | *-* |
| 72 | G72 | *Indica* | Hap-4 | 42 | 42 | 43 | 43 | 48 | *-* | *-* | *-* | *-* | *-* |
| 73 | G73 | *Indica* | Hap-1 | 28 | 25 | 25 | 25 | 30 | 25 | 32 | 28 | 30 | 32 |
| 74 | G74 | *Indica* | Hap-4 | 30 | 37 | 39 | 39 | 33 | 35 | 50 | 40 | 37 | 34 |
| 75 | G75 | *Indica* | Hap-4 | 28 | 34 | 35 | 35 | 33 | 31 | 30 | 28 | 28 | 25 |
| 76 | G76 | *Indica* | Hap-4 | 38 | 40 | 32 | 32 | 48 | *-* | *-* | *-* | *-* | *-* |
| 77 | G77 | *Japonica* | Hap-3 | 42 | 30 | 28 | 28 | 55 | 50 | 45 | 40 | 43 | 30 |
| 78 | G78 | *Japonica* | Hap-1 | 35 | 38 | 40 | 40 | 40 | 43 | 38 | 40 | 35 | 35 |
| 79 | G79 | *Indica* | Hap-1 | 48 | 40 | 45 | 45 | 40 | 35 | 38 | 40 | 45 | 40 |
| 80 | G80 | *Japonica* | Hap-1 | 35 | 48 | 40 | 40 | 43 | 35 | 45 | 48 | 45 | 40 |
| 81 | G81 | *Japonica* | Hap-1 | 25 | 28 | 32 | 32 | 35 | 48 | 23 | 25 | 38 | 35 |
| 82 | G82 | *Indica* | Hap-4 | 29 | 34 | 30 | 30 | 36 | 38 | 37 | 30 | 38 | 30 |
| 83 | G83 | *Indica* | Hap-4 | 28 | 27 | 29 | 29 | 29 | 30 | 28 | 25 | 25 | 23 |
| 84 | G84 | *Indica* | Hap-4 | 44 | 40 | 40 | 40 | 35 | *-* | *-* | *-* | *-* | *-* |
| 85 | G85 | *Japonica* | Hap-1 | 35 | 33 | 30 | 30 | 25 | 25 | 27 | 30 | 38 | 37 |
| 86 | G86 | *Japonica* | Hap-1 | 39 | 30 | 31 | 31 | 33 | 35 | 25 | 30 | 25 | 25 |
| 87 | G87 | *Indica* | Hap-4 | 37 | 30 | 34 | 34 | 37 | 53 | 35 | 30 | 60 | 40 |
| 88 | G88 | *Indica* | Hap-4 | 45 | 53 | 40 | 40 | 45 | 43 | 55 | 53 | 45 | 35 |
| 89 | G89 | *Indica* | Hap-4 | 28 | 34 | 40 | 40 | 32 | 47 | 42 | 38 | 35 | 35 |
| 90 | G90 | *Indica* | Hap-4 | 45 | 30 | 36 | 36 | 38 | 38 | 32 | 30 | 30 | 32 |
| 91 | G91 | *Indica* | Hap-4 | 50 | 35 | 45 | 45 | 45 | *-* | *-* | *-* | *-* | *-* |
| 92 | G92 | *Indica* | Hap-4 | 38 | 40 | 35 | 35 | 35 | 30 | 40 | 38 | 35 | 32 |
| 93 | G93 | *Japonica* | Hap-4 | 33 | 33 | 25 | 25 | 21 | 25 | 30 | 25 | 28 | 30 |
| 94 | G94 | *Indica* | Hap-4 | 28 | 22 | 25 | 25 | 20 | 35 | 25 | 30 | 30 | 35 |
| 95 | G95 | *Indica* | Hap-4 | 20 | 27 | 21 | 21 | 22 | 58 | 52 | 60 | 45 | 48 |
| 96 | G96 | *Indica* | Hap-4 | 50 | 55 | 45 | 45 | 48 | 60 | 68 | 55 | 55 | 90 |
| 97 | G97 | *Indica* | Hap-4 | 41 | 28 | 31 | 31 | 30 | 35 | 40 | 50 | 42 | 42 |
| 98 | G98 | *Indica* | Hap-4 | 30 | 33 | 35 | 35 | 30 | 40 | 38 | 28 | 35 | 40 |
| 99 | G99 | *Indica* | Hap-4 | 27 | 27 | 28 | 28 | 29 | 32 | 25 | 32 | 43 | 33 |
| 100 | G100 | *Indica* | Hap-4 | 33 | 27 | 32 | 32 | 28 | 35 | 30 | 30 | 40 | 35 |
| 101 | G101 | *Indica* | Hap-4 | 38 | 42 | 40 | 40 | 35 | *-* | *-* | *-* | *-* | *-* |
| 102 | G102 | *Indica* | Hap-4 | 30 | 40 | 50 | 50 | 55 | 28 | 50 | 28 | 43 | 26 |
| 103 | G103 | *Indica* | Hap-1 | 38 | 42 | 53 | 53 | 50 | 33 | 53 | 30 | 43 | 46 |
| 104 | G104 | *Japonica* | Hap-2 | 30 | 32 | 31 | 31 | 30 | 25 | 30 | 30 | 28 | 29 |
| 105 | G105 | *Japonica* | Hap-2 | 33 | 25 | 40 | 40 | 45 | 31 | 31 | 36 | 26 | 37 |
| 106 | G106 | *Indica* | Hap-4 | 45 | 50 | 45 | 45 | 44 | 65 | 52 | 45 | 45 | 48 |
| 107 | G107 | *Indica* | Hap-1 | 45 | 50 | 40 | 40 | 47 | 33 | 55 | 40 | 35 | 44 |
| 108 | G108 | *Indica* | Hap-4 | 52 | 58 | 58 | 58 | 45 | 50 | 50 | 55 | 50 | 60 |
| 109 | G109 | *Japonica* | Hap-4 | 38 | 40 | 44 | 44 | 43 | *-* | *-* | *-* | *-* | *-* |
| 110 | G110 | *Indica* | Hap-4 | 38 | 45 | 37 | 37 | 33 | 38 | 48 | 40 | 48 | 35 |
| 111 | G111 | *Japonica* | Hap-1 | 34 | 32 | 36 | 36 | 35 | 35 | 38 | 39 | 34 | 35 |
| 112 | G112 | *Japonica* | Hap-4 | 52 | 43 | 44 | 44 | 40 | *-* | *-* | *-* | *-* | *-* |
| 113 | G113 | *Indica* | Hap-1 | 28 | 40 | 24 | 24 | 35 | 32 | 33 | 30 | 36 | 32 |
| 114 | G114 | *Indica* | Hap-1 | 52 | 40 | 30 | 30 | 58 | 25 | 40 | 35 | 35 | 33 |
| 115 | G115 | *Indica* | Hap-1 | 23 | 32 | 27 | 27 | 25 | 30 | 28 | 25 | 35 | 38 |
| 116 | G116 | *Indica* | Hap-1 | 23 | 30 | 26 | 26 | 28 | 32 | 28 | 35 | 30 | 28 |
| 117 | G117 | *Japonica* | Hap-4 | 40 | 55 | 60 | 60 | 55 | 55 | 62 | 58 | 53 | 65 |
| 118 | G118 | *Indica* | Hap-2 | 30 | 22 | 25 | 25 | 23 | 25 | 25 | 28 | 25 | 37 |
| 119 | G119 | *Japonica* | Hap-1 | 28 | 31 | 35 | 35 | 30 | 28 | 31 | 38 | 30 | 35 |
| 120 | G120 | *Japonica* | Hap-4 | 52 | 52 | 48 | 48 | 45 | *-* | *-* | *-* | *-* | *-* |
| 121 | G121 | *Indica* | Hap-1 | 45 | 52 | 60 | 60 | 55 | 50 | 30 | 45 | 42 | 40 |
| 122 | G122 | *Indica* | Hap-4 | 36 | 31 | 38 | 38 | 30 | 35 | 55 | 48 | 38 | 58 |
| 123 | G123 | *Indica* | Hap-4 | 50 | 33 | 32 | 32 | 32 | 35 | 35 | 40 | 48 | 32 |
| 124 | G124 | *Japonica* | Hap-4 | 33 | 26 | 27 | 27 | 35 | 33 | 28 | 25 | 35 | 28 |
| 125 | G125 | *Indica* | Hap-4 | 30 | 30 | 31 | 31 | 41 | 35 | 38 | 33 | 35 | 33 |
| 126 | G126 | *Japonica* | Hap-1 | 40 | 33 | 36 | 36 | 35 | 35 | 25 | 33 | 35 | 33 |
| 127 | G127 | *Indica* | Hap-3 | 32 | 40 | 35 | 35 | 28 | 40 | 45 | 45 | 46 | 50 |
| 128 | G128 | *Indica* | Hap-4 | 25 | 23 | 20 | 20 | 22 | *-* | *-* | *-* | *-* | *-* |
| 129 | G129 | *Indica* | Hap-2 | 58 | 58 | 40 | 40 | 60 | 45 | 60 | 36 | 42 | 58 |
| 130 | G130 | *Indica* | Hap-4 | 34 | 32 | 45 | 45 | 35 | 40 | 42 | 35 | 35 | 33 |
| 131 | G131 | *Indica* | Hap-2 | 50 | 55 | 45 | 45 | 45 | 45 | 38 | 45 | 40 | 38 |
| 132 | G132 | *Japonica* | Hap-1 | 45 | 43 | 53 | 53 | 52 | 45 | 50 | 44 | 45 | 55 |
| 133 | G133 | *Japonica* | Hap-1 | 26 | 34 | 41 | 41 | 35 | 40 | 38 | 30 | 48 | 35 |
| 134 | G134 | *Indica* | Hap-1 | 28 | 36 | 35 | 35 | 33 | 55 | 45 | 48 | 35 | 52 |
| 135 | G135 | *Japonica* | Hap-1 | 0 | 0 | 0 | 0 | 0 | 0 | 0 | 0 | 0 | 0 |
| 136 | G136 | *Indica* | Hap-4 | 36 | 47 | 40 | 40 | 36 | 60 | 55 | 58 | 55 | 47 |
| 137 | G137 | *Japonica* | Hap-1 | 44 | 54 | 60 | 60 | 45 | *-* | *-* | *-* | *-* | *-* |
| 138 | G138 | *Indica* | Hap-4 | 25 | 23 | 20 | 20 | 34 | 30 | 31 | 37 | 33 | 32 |
| 139 | G139 | *Indica* | Hap-4 | 65 | 70 | 73 | 73 | 60 | 34 | 35 | 37 | 42 | 40 |
| 140 | G140 | *Indica* | Hap-1 | 45 | 39 | 45 | 45 | 48 | 55 | 35 | 38 | 35 | 50 |
| 141 | G141 | *Indica* | Hap-4 | *-* | *-* | *-* | *-* | *-* | *-* | *-* | *-* | *-* | *-* |
| 142 | G142 | *Indica* | Hap-4 | 35 | 35 | 40 | 40 | 40 | *-* | *-* | *-* | *-* | *-* |
| 143 | G143 | *Indica* | Hap-4 | 45 | 46 | 38 | 38 | 40 | 25 | 35 | 38 | 48 | 35 |
| 144 | G144 | *Indica* | Hap-4 | 35 | 36 | 34 | 34 | 48 | 38 | 35 | 40 | 38 | 40 |
| 145 | G145 | *Indica* | Hap-4 | 45 | 35 | 38 | 38 | 36 | 45 | 35 | 30 | 35 | 35 |
| 146 | G146 | *Japonica* | Hap-1 | 20 | 22 | 21 | 21 | 23 | 38 | 28 | 30 | 25 | 33 |
| 147 | G147 | *Indica* | Hap-1 | 40 | 55 | 45 | 45 | 40 | 48 | 52 | 48 | 39 | 52 |
| 148 | G148 | *Indica* | Hap-4 | 52 | 28 | 27 | 27 | 28 | *-* | *-* | *-* | *-* | *-* |
| 149 | G149 | *Indica* | Hap-4 | 25 | 28 | 18 | 18 | 25 | 28 | 30 | 38 | 38 | 28 |
| 150 | G150 | *Indica* | Hap-4 | 38 | 36 | 35 | 35 | 30 | 43 | 36 | 40 | 40 | 36 |
| 151 | G151 | *Japonica* | Hap-1 | 41 | 35 | 30 | 30 | 48 | 54 | 44 | 55 | 43 | 38 |
| 152 | G152 | *Japonica* | Hap-1 | 21 | 23 | 20 | 20 | 21 | 20 | 21 | 19 | 18 | 20 |
| 153 | G153 | *Indica* | Hap-1 | 40 | 35 | 50 | 50 | 52 | 50 | 43 | 60 | 60 | 58 |
| 154 | G154 | *Indica* | Hap-4 | 25 | 30 | 32 | 32 | 33 | 26 | 25 | 25 | 30 | 25 |
| 155 | G155 | *Indica* | Hap-1 | 23 | 31 | 30 | 30 | 31 | 28 | 30 | 25 | 25 | 28 |
| 156 | G156 | *Japonica* | Hap-1 | 28 | 29 | 30 | 30 | 25 | *-* | *-* | *-* | *-* | *-* |
| 157 | G157 | *Indica* | Hap-4 | 65 | 78 | 75 | 75 | 65 | 60 | 50 | 40 | 60 | 60 |
| 158 | G158 | *Japonica* | Hap-1 | 65 | 70 | 75 | 75 | 62 | 48 | 47 | 43 | 55 | 47 |
| 159 | G159 | *Japonica* | Hap-4 | 28 | 30 | 32 | 32 | 30 | *-* | *-* | *-* | *-* | *-* |
| 160 | G160 | *Japonica* | Hap-1 | 46 | 40 | 35 | 35 | 50 | 35 | 32 | 38 | 36 | 38 |
| 161 | G161 | *Indica* | Hap-4 | 35 | 36 | 34 | 34 | 37 | *-* | *-* | *-* | *-* | *-* |
| 162 | G162 | *Japonica* | Hap-4 | 25 | 24 | 27 | 27 | 28 | 28 | 32 | 25 | 28 | 24 |
| 163 | G163 | *Indica* | Hap-4 | 23 | 31 | 21 | 21 | 26 | 26 | 20 | 19 | 21 | 20 |
| 164 | G164 | *Indica* | Hap-2 | 34 | 26 | 25 | 25 | 35 | 35 | 25 | 35 | 33 | 26 |
| 165 | G165 | *Indica* | Hap-1 | 38 | 44 | 50 | 50 | 53 | 42 | 40 | 38 | 45 | 52 |
| 166 | G166 | *Indica* | Hap-1 | 32 | 30 | 28 | 28 | 26 | 30 | 25 | 26 | 30 | 28 |
| 167 | G167 | *Indica* | Hap-1 | 26 | 25 | 32 | 32 | 30 | 45 | 35 | 36 | 45 | 48 |
| 168 | G168 | *Indica* | Hap-4 | 37 | 31 | 35 | 35 | 40 | 40 | 30 | 50 | 42 | 38 |
| 169 | G169 | *Indica* | Hap-1 | 42 | 43 | 45 | 45 | 45 | 28 | 30 | 28 | 40 | 42 |
| 170 | G170 | *Indica* | Hap-4 | 30 | 38 | 45 | 45 | 48 | 42 | 45 | 36 | 35 | 33 |
| 171 | G171 | *Indica* | Hap-4 | 25 | 20 | 25 | 25 | 25 | 23 | 20 | 25 | 20 | 23 |
| 172 | G172 | *Indica* | Hap-4 | 30 | 28 | 25 | 25 | 26 | *-* | *-* | *-* | *-* | *-* |
| 173 | G173 | *Japonica* | Hap-1 | 70 | 40 | 45 | 45 | 55 | 40 | 50 | 53 | 34 | 48 |
| 174 | G174 | *Japonica* | Hap-1 | 35 | 30 | 32 | 32 | 30 | 28 | 25 | 35 | 25 | 30 |
| 175 | G175 | *Japonica* | Hap-1 | 35 | 30 | 40 | 40 | 25 | 32 | 36 | 36 | 31 | 35 |
| 176 | G176 | *Japonica* | Hap-1 | 60 | 52 | 45 | 45 | 45 | 31 | 36 | 35 | 40 | 40 |
| 177 | G177 | *Japonica* | Hap-1 | 33 | 32 | 32 | 32 | 31 | 41 | 38 | 37 | 41 | 38 |
| 178 | G178 | *Japonica* | Hap-1 | 45 | 40 | 45 | 45 | 45 | 40 | 38 | 30 | 41 | 37 |
| 179 | G179 | *Indica* | Hap-1 | 38 | 35 | 40 | 40 | 42 | 45 | 35 | 42 | 50 | 40 |
| 180 | G180 | *Indica* | Hap-4 | 37 | 35 | 30 | 30 | 34 | 53 | 57 | 44 | 45 | 50 |
| 181 | G181 | *Japonica* | Hap-4 | 36 | 40 | 35 | 35 | 50 | 53 | 41 | 45 | 42 | 38 |
| 182 | G182 | *Japonica* | Hap-1 | 62 | 45 | 60 | 60 | 65 | 45 | 40 | 33 | 42 | 50 |
| 183 | G183 | *Japonica* | Hap-4 | 32 | 25 | 25 | 25 | 20 | 20 | 16 | 17 | 18 | 18 |
| 184 | G184 | *Indica* | Hap-4 | 30 | 30 | 31 | 31 | 30 | 28 | 23 | 28 | 38 | 28 |
| 185 | G185 | *Indica* | Hap-4 | 28 | 25 | 23 | 23 | 25 | 20 | 21 | 25 | 20 | 25 |
| 186 | G186 | *Indica* | Hap-1 | 37 | 28 | 30 | 30 | 35 | 33 | 25 | 40 | 42 | 50 |
| 187 | G187 | *Indica* | Hap-4 | 55 | 45 | 50 | 50 | 60 | 33 | 28 | 47 | 44 | 48 |
| 188 | G188 | *Japonica* | Hap-2 | 35 | 70 | 35 | 35 | 80 | 41 | 39 | 54 | 60 | 70 |
| 189 | G189 | *Indica* | Hap-4 | 30 | 26 | 31 | 31 | 30 | 40 | 41 | 35 | 38 | 35 |
| 190 | G190 | *Japonica* | Hap-2 | 41 | 51 | 50 | 50 | 41 | 35 | 55 | 48 | 45 | 44 |
| 191 | G191 | *Indica* | Hap-4 | 35 | 35 | 35 | 35 | 44 | 35 | 40 | 38 | 45 | 45 |
| 192 | G192 | *Indica* | Hap-4 | 35 | 35 | 45 | 45 | 32 | 35 | 74 | 74 | 70 | 36 |
| 193 | G193 | *Indica* | Hap-4 | 30 | 50 | 30 | 30 | 38 | *-* | *-* | *-* | *-* | *-* |
| 194 | G194 | *Indica* | Hap-4 | 45 | 35 | 55 | 55 | 40 | 45 | 38 | 40 | 35 | 38 |
| 195 | G195 | *Indica* | Hap-1 | 30 | 30 | 35 | 35 | 35 | 38 | 37 | 34 | 39 | 35 |
| 196 | G196 | *Indica* | Hap-1 | 41 | 36 | 40 | 40 | 38 | 38 | 45 | 30 | 35 | 35 |
| 197 | G197 | *Japonica* | Hap-1 | 29 | 36 | 36 | 36 | 35 | 52 | 35 | 45 | 30 | 45 |
| 198 | G198 | *Indica* | Hap-1 | 36 | 38 | 30 | 30 | 30 | 35 | 32 | 33 | 35 | 33 |
| 199 | G199 | *Indica* | Hap-4 | 35 | 39 | 35 | 35 | 37 | 40 | 45 | 42 | 48 | 35 |
| 200 | G200 | *Japonica* | Hap-4 | 35 | 28 | 30 | 30 | 30 | 36 | 25 | 30 | 26 | 27 |
| 201 | G201 | *Japonica* | Hap-4 | 40 | 40 | 40 | 40 | 48 | 44 | 35 | 32 | 39 | 36 |
| 202 | G202 | *Japonica* | Hap-4 | 35 | 36 | 35 | 35 | 31 | 32 | 35 | 32 | 38 | 28 |
| 203 | G203 | *Indica* | Hap-4 | 32 | 34 | 28 | 28 | 40 | 51 | 43 | 40 | 30 | 45 |
| 204 | G204 | *Indica* | Hap-1 | 30 | 32 | 35 | 35 | 30 | 25 | 33 | 35 | 34 | 35 |
| 205 | G205 | *Indica* | Hap-4 | 35 | 21 | 28 | 28 | 45 | 28 | 32 | 26 | 35 | 28 |
| 206 | G206 | *Indica* | Hap-4 | 30 | 40 | 30 | 30 | 35 | 35 | 38 | 40 | 38 | 43 |
| 207 | G207 | *Japonica* | Hap-1 | 41 | 45 | 35 | 35 | 34 | 39 | 36 | 28 | 25 | 40 |
| 208 | G208 | *Japonica* | Hap-1 | 37 | 36 | 35 | 35 | 44 | 33 | 38 | 37 | 34 | 29 |
| 209 | G209 | *Indica* | Hap-4 | 44 | 42 | 43 | 43 | 35 | 38 | 35 | 43 | 35 | 45 |
| 210 | G210 | *Indica* | Hap-4 | 40 | 35 | 38 | 38 | 36 | 30 | 35 | 37 | 38 | 33 |
| 211 | G211 | *Indica* | Hap-4 | 30 | 30 | 30 | 30 | 30 | 31 | 31 | 28 | 32 | 20 |
| 212 | G212 | *Indica* | Hap-4 | 40 | 38 | 37 | 37 | 40 | 35 | 38 | 28 | 35 | 45 |
| 213 | G213 | *Indica* | Hap-1 | 40 | 30 | 28 | 28 | 32 | 41 | 30 | 42 | 35 | 35 |
| 214 | G214 | *Indica* | Hap-1 | 36 | 30 | 40 | 40 | 39 | 46 | 40 | 40 | 42 | 42 |
| 215 | G215 | *Japonica* | Hap-1 | 30 | 40 | 42 | 42 | 45 | 50 | 38 | 36 | 51 | 50 |
| 216 | G216 | *Indica* | Hap-4 | 40 | 30 | 35 | 35 | 50 | 45 | 30 | 25 | 45 | 40 |
| 217 | G217 | *Japonica* | Hap-4 | 28 | 35 | 35 | 35 | 40 | 33 | 28 | 25 | 40 | 45 |
| 218 | G218 | *Indica* | Hap-4 | 35 | 45 | 50 | 50 | 60 | 40 | 42 | 40 | 42 | 45 |
| 219 | G219 | *Japonica* | Hap-1 | 50 | 45 | 60 | 60 | 58 | 48 | 42 | 58 | 44 | 50 |
| 220 | G220 | *Japonica* | Hap-1 | 30 | 32 | 42 | 42 | 40 | 23 | 40 | 45 | 28 | 40 |
| 221 | G221 | *Indica* | Hap-1 | 85 | 75 | 88 | 88 | 70 | 60 | 40 | 40 | 45 | 40 |
| 222 | G222 | *Japonica* | Hap-1 | 60 | 55 | 58 | 58 | 0 | 0 | 0 | 0 | 0 | 0 |
| 223 | G223 | *Indica* | Hap-2 | *-* | *-* | *-* | *-* | *-* | *-* | *-* | *-* | *-* | *-* |
| 224 | G224 | *Japonica* | Hap-2 | 38 | 37 | 40 | 40 | 34 | 33 | 37 | 34 | 40 | 39 |
| 225 | G225 | *Indica* | Hap-5 | 26 | 35 | 35 | 35 | 45 | 30 | 38 | 26 | 32 | 40 |
| 226 | G226 | *Japonica* | Hap-5 | 25 | 28 | 25 | 25 | 28 | 32 | 38 | 40 | 40 | 42 |
| 227 | G227 | *Indica* | Hap-4 | 35 | 40 | 30 | 30 | 39 | 40 | 45 | 30 | 35 | 42 |
| 228 | G228 | *Indica* | Hap-4 | 35 | 35 | 30 | 30 | 28 | 37 | 30 | 46 | 35 | 45 |
| 229 | G229 | *Indica* | Hap-4 | 40 | 30 | 28 | 28 | 35 | 25 | 36 | 26 | 27 | 25 |
| 230 | G230 | *Indica* | Hap-4 | 35 | 36 | 40 | 40 | 45 | 22 | 25 | 18 | 24 | 20 |
| 231 | G231 | *Indica* | Hap-4 | 0 | 0 | 0 | 0 | 0 | 0 | 0 | 0 | 0 | 0 |
| 232 | G232 | *Indica* | Hap-4 | 40 | 30 | 30 | 30 | 30 | 26 | 26 | 28 | 32 | 35 |
| 233 | G233 | *Indica* | Hap-4 | 80 | 84 | 88 | 88 | 89 | 85 | 80 | 60 | 75 | 75 |
| 234 | G234 | *Indica* | Hap-4 | 60 | 70 | 65 | 65 | 72 | 55 | 49 | 74 | 75 | 50 |
| 235 | G235 | *Indica* | Hap-4 | 70 | 60 | 55 | 55 | 80 | 62 | 45 | 48 | 48 | 49 |
| 236 | G236 | *Indica* | Hap-4 | 48 | 40 | 45 | 45 | 53 | 40 | 42 | 45 | 35 | 40 |
| 237 | G237 | *Indica* | Hap-4 | 35 | 40 | 30 | 30 | 45 | 47 | 33 | 44 | 32 | 40 |
| 238 | G238 | *Indica* | Hap-4 | 46 | 50 | 48 | 48 | 55 | *-* | *-* | *-* | *-* | *-* |
| 239 | G239 | *Indica* | Hap-4 | 40 | 45 | 45 | 45 | 40 | 45 | 38 | 39 | 35 | 44 |
| 240 | G240 | *Indica* | Hap-4 | 50 | 38 | 38 | 38 | 40 | 43 | 33 | 34 | 40 | 30 |
| 241 | G241 | *Indica* | Hap-4 | 40 | 50 | 44 | 44 | 45 | 40 | 35 | 38 | 40 | 44 |
| 242 | G242 | *Indica* | Hap-4 | 45 | 40 | 40 | 40 | 40 | 28 | 35 | 30 | 31 | 40 |
| 243 | G243 | *Indica* | Hap-4 | 38 | 37 | 35 | 35 | 48 | 38 | 40 | 40 | 31 | 37 |
| 244 | G244 | *Indica* | Hap-4 | 45 | 46 | 50 | 50 | 60 | 50 | 42 | 45 | 38 | 58 |
| 245 | G245 | *Indica* | Hap-4 | 55 | 60 | 54 | 54 | 50 | 40 | 50 | 48 | 35 | 44 |
| 246 | G246 | *Japonica* | Hap-1 | 50 | 45 | 35 | 35 | 35 | 38 | 35 | 30 | 42 | 45 |
| 247 | G247 | *Japonica* | Hap-1 | 45 | 48 | 50 | 50 | 48 | 50 | 60 | 58 | 58 | 50 |
| 248 | G248 | *Indica* | Hap-1 | 45 | 48 | 48 | 48 | 53 | 62 | 60 | 48 | 54 | 50 |
| 249 | G249 | *Japonica* | Hap-4 | 35 | 35 | 40 | 40 | 30 | *-* | *-* | *-* | *-* | *-* |
| 250 | G250 | *Indica* | Hap-4 | 45 | 45 | 44 | 44 | 45 | 45 | 52 | 45 | 50 | 0 |
| 251 | G251 | *Indica* | Hap-4 | 28 | 48 | 43 | 43 | 45 | *-* | *-* | *-* | *-* | *-* |
| 252 | G252 | *Indica* | Hap-4 | 30 | 32 | 33 | 33 | 35 | *-* | *-* | *-* | *-* | *-* |
| 253 | G253 | *Indica* | Hap-1 | 30 | 35 | 45 | 45 | 30 | *-* | *-* | *-* | *-* | *-* |
| 254 | G254 | *Japonica* | Hap-1 | 43 | 38 | 44 | 44 | 38 | *-* | *-* | *-* | *-* | *-* |
| 255 | G255 | *Indica* | Hap-4 | 38 | 30 | 35 | 35 | 33 | *-* | *-* | *-* | *-* | *-* |
| 256 | G256 | *Indica* | Hap-1 | 24 | 30 | 23 | 23 | 35 | *-* | *-* | *-* | *-* | *-* |
| 257 | G257 | *Indica* | Hap-1 | *-* | *-* | *-* | *-* | *-* | *-* | *-* | *-* | *-* | *-* |
| 258 | G258 | *Indica* | Hap-4 | 60 | 40 | 50 | 50 | 65 | *-* | *-* | *-* | *-* | *-* |
| 259 | G259 | *Indica* | Hap-4 | 202 | 18 | 19 | 19 | 20 | *-* | *-* | *-* | *-* | *-* |
| 260 | G260 | *Indica* | Hap-1 | 43 | 40 | 28 | 28 | 30 | *-* | *-* | *-* | *-* | *-* |
| 261 | G261 | *Japonica* | Hap-4 | 40 | 55 | 44 | 44 | 48 | *-* | *-* | *-* | *-* | *-* |
| 262 | G262 | *Japonica* | Hap-1 | *-* | *-* | *-* | *-* | *-* | *-* | *-* | *-* | *-* | *-* |
| 263 | G263 | *Japonica* | Hap-4 | 60 | 52 | 60 | 60 | 70 | *-* | *-* | *-* | *-* | *-* |
| 264 | G264 | *Indica* | Hap-4 | *-* | *-* | *-* | *-* | *-* | *-* | *-* | *-* | *-* | *-* |
| 265 | G265 | *Indica* | Hap-1 | *-* | *-* | *-* | *-* | *-* | *-* | *-* | *-* | *-* | *-* |
| 266 | G266 | *Indica* | Hap-4 | 52 | 45 | 42 | 42 | 35 | *-* | *-* | *-* | *-* | *-* |
| 267 | G267 | *Indica* | Hap-1 | 30 | 28 | 25 | 25 | 31 | *-* | *-* | *-* | *-* | *-* |
| 268 | G268 | *Indica* | Hap-4 | *-* | *-* | *-* | *-* | *-* | *-* | *-* | *-* | *-* | *-* |
| 269 | G269 | *Japonica* | Hap-1 | 23 | 30 | 30 | 30 | 25 | *-* | *-* | *-* | *-* | *-* |
| 270 | G270 | *Japonica* | Hap-1 | *-* | *-* | *-* | *-* | *-* | *-* | *-* | *-* | *-* | *-* |
| 271 | G271 | *Japonica* | Hap-4 | *-* | *-* | *-* | *-* | *-* | *-* | *-* | *-* | *-* | *-* |
| 272 | G272 | *Japonica* | Hap-1 | 45 | 38 | 30 | 30 | 28 | *-* | *-* | *-* | *-* | *-* |
| 273 | G273 | *Indica* | Hap-1 | 44 | 40 | 45 | 45 | 40 | *-* | *-* | *-* | *-* | *-* |
| 274 | G274 | *Japonica* | Hap-1 | *-* | *-* | *-* | *-* | *-* | *-* | *-* | *-* | *-* | *-* |
| 275 | G275 | *Japonica* | Hap-4 | 60 | 57 | 75 | 75 | 50 | *-* | *-* | *-* | *-* | *-* |
| 276 | G276 | *Indica* | Hap-4 | 25 | 30 | 31 | 31 | 28 | *-* | *-* | *-* | *-* | *-* |
| 277 | G277 | *Japonica* | Hap-4 | 30 | 25 | 38 | 38 | 24 | *-* | *-* | *-* | *-* | *-* |
| 278 | G278 | *Japonica* | Hap-4 | 30 | 40 | 25 | 25 | 35 | *-* | *-* | *-* | *-* | *-* |
| 279 | G279 | *Japonica* | Hap-1 | 52 | 45 | 58 | 58 | 50 | *-* | *-* | *-* | *-* | *-* |
| 280 | G280 | *Indica* | Hap-1 | 68 | 60 | 61 | 61 | 70 | *-* | *-* | *-* | *-* | *-* |
| 281 | G281 | *Japonica* | Hap-1 | 23 | 25 | 26 | 26 | 25 | *-* | *-* | *-* | *-* | *-* |
| 282 | G282 | *Indica* | Hap-1 | 18 | 20 | 24 | 24 | 25 | *-* | *-* | *-* | *-* | *-* |
| 283 | G283 | *Indica* | Hap-2 | 37 | 30 | 31 | 31 | 40 | *-* | *-* | *-* | *-* | *-* |
| 284 | G284 | *Japonica* | Hap-4 | 38 | 30 | 28 | 28 | 35 | *-* | *-* | *-* | *-* | *-* |
| 285 | G285 | *Japonica* | Hap-4 | 30 | 34 | 33 | 33 | 30 | *-* | *-* | *-* | *-* | *-* |
| 286 | G286 | *Indica* | Hap-1 | 36 | 40 | 40 | 40 | 35 | *-* | *-* | *-* | *-* | *-* |
| 287 | G287 | *Japonica* | Hap-4 | 55 | 65 | 40 | 40 | 40 | *-* | *-* | *-* | *-* | *-* |
| 288 | G288 | *Indica* | Hap-1 | 55 | 53 | 48 | 48 | 65 | *-* | *-* | *-* | *-* | *-* |
| 289 | G289 | *Indica* | Hap-4 | 35 | 35 | 38 | 38 | 25 | *-* | *-* | *-* | *-* | *-* |
| 290 | G290 | *Japonica* | Hap-4 | 35 | 31 | 34 | 34 | 33 | *-* | *-* | *-* | *-* | *-* |
| 291 | G291 | *Indica* | Hap-1 | 35 | 35 | 30 | 30 | 30 | *-* | *-* | *-* | *-* | *-* |
| 292 | G292 | *Japonica* | Hap-1 | 44 | 40 | 38 | 38 | 43 | *-* | *-* | *-* | *-* | *-* |
| 293 | G293 | *Indica* | Hap-4 | 37 | 35 | 25 | 25 | 38 | *-* | *-* | *-* | *-* | *-* |
| 294 | G294 | *Indica* | Hap-4 | *-* | *-* | *-* | *-* | *-* | *-* | *-* | *-* | *-* | *-* |
| 295 | G295 | *Indica* | Hap-4 | 41 | 30 | 35 | 35 | 38 | *-* | *-* | *-* | *-* | *-* |
| 296 | G296 | *Japonica* | Hap-4 | 43 | 44 | 40 | 40 | 38 | *-* | *-* | *-* | *-* | *-* |
| 297 | G297 | *Indica* | Hap-4 | 45 | 42 | 38 | 38 | 35 | *-* | *-* | *-* | *-* | *-* |
| 298 | G298 | *Indica* | Hap-4 | 40 | 32 | 38 | 38 | 38 | *-* | *-* | *-* | *-* | *-* |
| 299 | G299 | *Japonica* | Hap-4 | 40 | 38 | 32 | 32 | 30 | *-* | *-* | *-* | *-* | *-* |
| 300 | G300 | *Indica* | Hap-4 | 50 | 46 | 38 | 38 | 35 | *-* | *-* | *-* | *-* | *-* |
| 301 | G301 | *Indica* | Hap-4 | 72 | 75 | 68 | 68 | 85 | *-* | *-* | *-* | *-* | *-* |
| 302 | G302 | *Indica* | Hap-4 | 35 | 30 | 31 | 31 | 25 | *-* | *-* | *-* | *-* | *-* |
| 303 | G303 | *Indica* | Hap-2 | 32 | 35 | 28 | 28 | 33 | *-* | *-* | *-* | *-* | *-* |
| 304 | G304 | *Indica* | Hap-4 | *-* | *-* | *-* | *-* | *-* | *-* | *-* | *-* | *-* | *-* |
| 305 | G305 | *Indica* | Hap-1 | 31 | 40 | 46 | 46 | 35 | *-* | *-* | *-* | *-* | *-* |
| 306 | G306 | *Indica* | Hap-4 | 57 | 47 | 37 | 37 | 45 | *-* | *-* | *-* | *-* | *-* |
| 307 | G307 | *Indica* | Hap-4 | 60 | 44 | 45 | 45 | 50 | *-* | *-* | *-* | *-* | *-* |
| 308 | G308 | *Indica* | Hap-4 | 36 | 38 | 50 | 50 | 33 | *-* | *-* | *-* | *-* | *-* |
| 309 | G309 | *Indica* | Hap-4 | 35 | 35 | 33 | 33 | 35 | *-* | *-* | *-* | *-* | *-* |
| 310 | G310 | *Indica* | Hap-4 | 35 | 41 | 38 | 38 | 45 | *-* | *-* | *-* | *-* | *-* |
| 311 | G311 | *Indica* | Hap-4 | 62 | 60 | 70 | 70 | 45 | *-* | *-* | *-* | *-* | *-* |
| 312 | G312 | *Indica* | Hap-4 | 35 | 40 | 40 | 40 | 35 | *-* | *-* | *-* | *-* | *-* |
| 313 | G313 | *Indica* | Hap-1 | 30 | 25 | 35 | 35 | 35 | *-* | *-* | *-* | *-* | *-* |
| 314 | G314 | *Japonica* | Hap-1 | *-* | *-* | *-* | *-* | *-* | *-* | *-* | *-* | *-* | *-* |
| 315 | G315 | *Indica* | Hap-1 | 50 | 60 | 60 | 60 | 50 | 53 | 45 | 44 | 45 | 40 |
| 316 | G316 | *Japonica* | Hap-1 | 45 | 40 | 44 | 44 | 43 | 45 | 35 | 50 | 50 | 50 |
| 317 | G317 | *Japonica* | Hap-1 | 25 | 26 | 24 | 24 | 23 | 20 | 24 | 21 | 23 | 25 |
| 318 | G318 | *Indica* | Hap-1 | 40 | 38 | 40 | 40 | 40 | 35 | 38 | 38 | 38 | 47 |
| 319 | G319 | *Indica* | Hap-4 | 55 | 40 | 45 | 45 | 43 | 41 | 40 | 43 | 45 | 40 |
| 320 | G320 | *Indica* | Hap-4 | 30 | 30 | 25 | 25 | 30 | 30 | 31 | 25 | 25 | 25 |
| 321 | G321 | *Indica* | Hap-1 | 52 | 45 | 40 | 40 | 45 | 55 | 58 | 45 | 50 | 52 |
| 322 | G322 | *Japonica* | Hap-1 | 45 | 39 | 45 | 45 | 45 | 55 | 50 | 35 | 40 | 55 |
| 323 | G323 | *Japonica* | Hap-1 | 47 | 38 | 40 | 40 | 37 | 30 | 50 | 35 | 34 | 35 |
| 324 | G324 | *Indica* | Hap-1 | 32 | 30 | 36 | 36 | 35 | 58 | 58 | 44 | 35 | 45 |
| 325 | G325 | *Japonica* | Hap-1 | 46 | 55 | 51 | 51 | 55 | 50 | 45 | 45 | 50 | 50 |
| 326 | G326 | *Indica* | Hap-4 | 38 | 32 | 36 | 36 | 38 | 42 | 35 | 30 | 37 | 38 |
| 327 | G327 | *Indica* | Hap-4 | 55 | 60 | 55 | 55 | 50 | 55 | 50 | 45 | 58 | 58 |
| 328 | G328 | *Japonica* | Hap-1 | 40 | 33 | 48 | 48 | 55 | 55 | 48 | 38 | 52 | 50 |
| 329 | G329 | *Japonica* | Hap-1 | 45 | 38 | 35 | 35 | 35 | 38 | 40 | 38 | 37 | 45 |
| 330 | G330 | *Indica* | Hap-1 | 22 | 32 | 35 | 35 | 28 | 36 | 30 | 38 | 35 | 30 |
| 331 | G331 | *Japonica* | Hap-4 | 40 | 28 | 35 | 35 | 38 | 28 | 31 | 35 | 32 | 28 |
| 332 | G332 | *Japonica* | Hap-2 | 40 | 35 | 41 | 41 | 33 | 36 | 38 | 45 | 45 | 38 |
| 333 | G333 | *Indica* | Hap-4 | 35 | 40 | 36 | 36 | 33 | 38 | 35 | 38 | 37 | 39 |
| 334 | G334 | *Indica* | Hap-1 | 40 | 41 | 48 | 48 | 44 | 52 | 45 | 58 | 50 | 48 |
| 335 | G335 | *Japonica* | Hap-1 | 38 | 43 | 30 | 30 | 35 | 40 | 35 | 45 | 50 | 58 |
| 336 | G336 | *Indica* | Hap-1 | 34 | 28 | 22 | 22 | 30 | 35 | 35 | 25 | 30 | 30 |
| 337 | G337 | *Indica* | Hap-4 | 39 | 34 | 34 | 34 | 25 | 30 | 35 | 32 | 28 | 25 |
| 338 | G338 | *Indica* | Hap-4 | 37 | 26 | 28 | 28 | 28 | 41 | 28 | 30 | 25 | 38 |
| 339 | G339 | *Indica* | Hap-4 | 40 | 30 | 30 | 30 | 28 | 41 | 35 | 35 | 33 | 42 |
| 340 | G340 | *Indica* | Hap-4 | 31 | 33 | 32 | 32 | 95 | 35 | 55 | 38 | 48 | 48 |
| 341 | G341 | *Indica* | Hap-4 | 40 | 30 | 40 | 40 | 28 | 43 | 42 | 30 | 32 | 30 |
| 342 | G342 | *Indica* | Hap-4 | 50 | 50 | 40 | 40 | 55 | 46 | 51 | 39 | 50 | 50 |
| 343 | G343 | *Japonica* | Hap-4 | 38 | 38 | 31 | 31 | 33 | 36 | 32 | 34 | 35 | 42 |
| 344 | G344 | *Indica* | Hap-4 | 35 | 30 | 29 | 29 | 31 | 38 | 39 | 30 | 30 | 30 |
| 345 | G345 | *Indica* | Hap-4 | 35 | 38 | 40 | 40 | 35 | 30 | 36 | 44 | 34 | 39 |
| 346 | G346 | *Japonica* | Hap-4 | 35 | 33 | 33 | 33 | 29 | 41 | 33 | 38 | 40 | 35 |
| 347 | G347 | *Indica* | Hap-4 | 37 | 44 | 40 | 40 | 43 | 35 | 38 | 32 | 30 | 28 |
| 348 | G348 | *Indica* | Hap-4 | 32 | 33 | 31 | 31 | 34 | 40 | 30 | 35 | 35 | 40 |
| 349 | G349 | *Indica* | Hap-1 | 32 | 35 | 30 | 30 | 30 | 31 | 38 | 32 | 34 | 35 |
| 350 | G350 | *Indica* | Hap-4 | 35 | 30 | 33 | 33 | 45 | 37 | 28 | 28 | 25 | 38 |
| 351 | G351 | *Indica* | Hap-1 | 35 | 38 | 40 | 40 | 50 | 45 | 38 | 50 | 65 | 45 |
| 352 | G352 | *Indica* | Hap-1 | 28 | 28 | 36 | 36 | 36 | 36 | 32 | 25 | 38 | 38 |
| 353 | G353 | *Indica* | Hap-4 | 35 | 40 | 35 | 35 | 44 | 33 | 35 | 38 | 38 | 36 |
| 354 | G354 | *Indica* | Hap-4 | 35 | 40 | 35 | 35 | 28 | 38 | 30 | 35 | 35 | 33 |
| 355 | G355 | *Indica* | Hap-1 | 30 | 31 | 31 | 31 | 30 | 26 | 20 | 32 | 30 | 28 |
| 356 | G356 | *Japonica* | Hap-1 | 40 | 40 | 38 | 38 | 55 | 35 | 28 | 29 | 31 | 30 |
| 357 | G357 | *Japonica* | Hap-1 | 25 | 25 | 22 | 22 | 21 | 20 | 28 | 23 | 20 | 25 |
| 358 | G358 | *Indica* | Hap-4 | 38 | 32 | 38 | 38 | 35 | 28 | 32 | 33 | 32 | 28 |
| 359 | G359 | *Indica* | Hap-1 | 23 | 28 | 32 | 32 | 26 | 27 | 20 | 30 | 30 | 34 |
| 360 | G360 | *Indica* | Hap-1 | 70 | 55 | 77 | 77 | 70 | 50 | 65 | 70 | 82 | 70 |
| 361 | G361 | *Indica* | Hap-1 | 35 | 35 | 45 | 45 | 40 | 35 | 45 | 50 | 50 | 35 |
| 362 | G362 | *Indica* | Hap-4 | 40 | 52 | 45 | 45 | 44 | 38 | 65 | 55 | 45 | 40 |
| 363 | G363 | *Indica* | Hap-1 | 40 | 35 | 25 | 25 | 43 | 40 | 52 | 45 | 43 | 53 |
| 364 | G364 | *Japonica* | Hap-1 | 35 | 30 | 30 | 30 | 35 | 33 | 35 | 40 | 35 | 33 |
| 365 | G365 | *Indica* | Hap-1 | 35 | 40 | 35 | 35 | 38 | 33 | 37 | 40 | 42 | 40 |
| 366 | G366 | *Indica* | Hap-1 | 21 | 21 | 22 | 22 | 22 | 22 | 18 | 25 | 23 | 25 |
| 367 | G367 | *Japonica* | Hap-1 | 40 | 33 | 50 | 50 | 35 | 30 | 70 | 38 | 43 | 45 |
| 368 | G368 | *Japonica* | Hap-1 | 38 | 45 | 30 | 30 | 30 | 33 | 25 | 27 | 24 | 26 |
| 369 | G369 | *Indica* | Hap-4 | 27 | 34 | 35 | 35 | 23 | 35 | 45 | 48 | 35 | 58 |
| 370 | G370 | *Indica* | Hap-4 | 40 | 31 | 40 | 40 | 50 | 42 | 40 | 35 | 38 | 55 |
| 371 | G371 | *Japonica* | Hap-4 | 25 | 25 | 24 | 24 | 21 | 26 | 25 | 20 | 18 | 26 |
| 372 | G372 | *Japonica* | Hap-4 | 30 | 28 | 25 | 25 | 30 | 31 | 31 | 42 | 35 | 42 |
| 373 | G373 | *Japonica* | Hap-4 | 50 | 52 | 53 | 53 | 50 | 60 | 45 | 58 | 53 | 55 |
| 374 | G374 | *Japonica* | Hap-1 | 46 | 45 | 42 | 42 | 45 | 40 | 38 | 35 | 33 | 43 |
| 375 | G375 | *Indica* | Hap-4 | 40 | 42 | 36 | 36 | 36 | 38 | 38 | 33 | 48 | 40 |
| 376 | G376 | *Japonica* | Hap-1 | 35 | 46 | 45 | 45 | 35 | 38 | 30 | 23 | 44 | 40 |
| 377 | G377 | *Indica* | Hap-4 | 31 | 27 | 32 | 32 | 45 | 38 | 28 | 35 | 36 | 30 |
| 378 | G378 | *Indica* | Hap-4 | 40 | 26 | 32 | 32 | 35 | 39 | 33 | 35 | 25 | 34 |
| 379 | G379 | *Indica* | Hap-4 | 34 | 36 | 38 | 38 | 40 | 40 | 45 | 30 | 35 | 30 |
| 380 | G380 | *Indica* | Hap-1 | 35 | 40 | 45 | 45 | 50 | 40 | 40 | 45 | 38 | 36 |
| 381 | G381 | *Indica* | Hap-4 | 41 | 36 | 35 | 35 | 41 | 32 | 34 | 42 | 40 | 37 |
| 382 | G382 | *Japonica* | Hap-1 | 41 | 48 | 50 | 50 | 37 | 38 | 40 | 37 | 48 | 40 |
| 383 | G383 | *Indica* | Hap-4 | 50 | 52 | 45 | 45 | 50 | 55 | 74 | 60 | 60 | 50 |
| 384 | G384 | *Japonica* | Hap-1 | 38 | 37 | 30 | 30 | 38 | 35 | 35 | 28 | 26 | 24 |
| 385 | G385 | *Indica* | Hap-1 | 46 | 36 | 47 | 47 | 44 | 41 | 30 | 32 | 25 | 38 |
| 386 | G386 | *Indica* | Hap-4 | 55 | 55 | 54 | 54 | 61 | 50 | 40 | 38 | 55 | 55 |
| 387 | G387 | *Japonica* | Hap-1 | 45 | 42 | 38 | 38 | 33 | 35 | 31 | 30 | 35 | 35 |
| 388 | G388 | *Indica* | Hap-4 | 28 | 42 | 35 | 35 | 38 | 47 | 38 | 35 | 47 | 38 |
| 389 | G389 | *Japonica* | Hap-2 | 28 | 28 | 25 | 25 | 40 | 30 | 35 | 40 | 25 | 40 |
| 390 | G390 | *Japonica* | Hap-1 | 43 | 42 | 42 | 42 | 40 | 30 | 38 | 41 | 35 | 30 |
| 391 | G391 | *Japonica* | Hap-1 | 35 | 33 | 30 | 30 | 30 | 35 | 42 | 40 | 45 | 35 |
| 392 | G392 | *Indica* | Hap-1 | 35 | 33 | 35 | 35 | 30 | 30 | 28 | 45 | 30 | 30 |
| 393 | G393 | *Japonica* | Hap-1 | 31 | 35 | 38 | 38 | 36 | 25 | 38 | 26 | 32 | 30 |
| 394 | G394 | *Indica* | Hap-4 | 35 | 30 | 40 | 40 | 40 | 30 | 33 | 28 | 31 | 31 |
| 395 | G395 | *Indica* | Hap-2 | 27 | 20 | 21 | 21 | 21 | 27 | 40 | 32 | 42 | 25 |
| 396 | G396 | *Indica* | Hap-4 | 30 | 26 | 35 | 35 | 38 | 41 | 42 | 38 | 33 | 33 |
| 397 | G397 | *Indica* | Hap-4 | 21 | 31 | 22 | 22 | 30 | 41 | 39 | 43 | 40 | 40 |
| 398 | G398 | *Japonica* | Hap-2 | 37 | 48 | 37 | 37 | 36 | 28 | 26 | 35 | 35 | 33 |
| 399 | G399 | *Indica* | Hap-4 | 35 | 43 | 38 | 38 | 45 | 45 | 38 | 58 | 40 | 48 |
| 400 | G400 | *Indica* | Hap-4 | 28 | 35 | 35 | 35 | 40 | 41 | 36 | 40 | 40 | 38 |
| 401 | G401 | *Indica* | Hap-4 | 30 | 35 | 41 | 41 | 35 | 43 | 35 | 45 | 40 | 40 |
| 402 | G402 | *Indica* | Hap-4 | 90 | 80 | 55 | 55 | 58 | 65 | 48 | 41 | 45 | 50 |
| 403 | G403 | *Indica* | Hap-4 | 28 | 34 | 34 | 34 | 37 | 35 | 36 | 40 | 42 | 42 |
| 404 | G404 | *Japonica* | Hap-4 | 60 | 70 | 60 | 60 | 50 | 35 | 45 | 30 | 45 | 44 |
| 405 | G405 | *Indica* | Hap-4 | 70 | 55 | 58 | 58 | 55 | 48 | 43 | 36 | 48 | 40 |
| 406 | G406 | *Indica* | Hap-4 | 45 | 35 | 40 | 40 | 39 | 35 | 26 | 44 | 38 | 36 |
| 407 | G407 | *Indica* | Hap-1 | 40 | 43 | 45 | 45 | 43 | 52 | 45 | 41 | 55 | 45 |
| 408 | G408 | *Indica* | Hap-4 | 38 | 34 | 48 | 48 | 48 | 37 | 43 | 38 | 32 | 44 |
| 409 | G409 | *Japonica* | Hap-1 | 41 | 30 | 35 | 35 | 45 | 36 | 33 | 23 | 35 | 27 |
| 410 | G410 | *Indica* | Hap-4 | 30 | 38 | 28 | 28 | 31 | 30 | 33 | 31 | 33 | 35 |
| 411 | G411 | *Indica* | Hap-4 | 43 | 50 | 48 | 48 | 45 | 31 | 33 | 21 | 22 | 20 |
| 412 | G412 | *Indica* | Hap-4 | 45 | 40 | 48 | 48 | 35 | 25 | 30 | 40 | 40 | 35 |
| 413 | G413 | *Indica* | Hap-4 | 39 | 40 | 37 | 37 | 40 | 35 | 30 | 32 | 25 | 30 |
| 414 | G414 | *Indica* | Hap-1 | 35 | 36 | 50 | 50 | 40 | 30 | 30 | 35 | 35 | 40 |
| 415 | G415 | *Indica* | Hap-1 | 35 | 50 | 42 | 42 | 38 | 45 | 60 | 45 | 70 | 30 |
| 416 | G416 | *Indica* | Hap-4 | 30 | 35 | 35 | 35 | 33 | 30 | 38 | 28 | 29 | 36 |
| 417 | G417 | *Indica* | Hap-1 | 33 | 33 | 30 | 30 | 30 | 39 | 40 | 35 | 38 | 30 |
| 418 | G418 | *Indica* | Hap-1 | 30 | 35 | 40 | 40 | 40 | 45 | 35 | 30 | 44 | 45 |
| 419 | G419 | *Indica* | Hap-1 | 30 | 30 | 25 | 25 | 45 | 35 | 48 | 45 | 40 | 35 |
| 420 | G420 | *Indica* | Hap-1 | 23 | 26 | 35 | 35 | 35 | 32 | 33 | 28 | 30 | 35 |
| 421 | G421 | *Indica* | Hap-4 | 33 | 34 | 36 | 36 | 34 | 35 | 38 | 40 | 32 | 34 |
| 422 | G422 | *Indica* | Hap-1 | 40 | 38 | 45 | 45 | 40 | 31 | 30 | 32 | 35 | 38 |
| 423 | G423 | *Indica* | Hap-4 | 35 | 40 | 38 | 38 | 38 | 25 | 28 | 38 | 40 | 35 |
| 424 | G424 | *Indica* | Hap-1 | 37 | 30 | 33 | 33 | 28 | 35 | 40 | 38 | 33 | 32 |
| 425 | G425 | *Indica* | Hap-1 | 35 | 40 | 38 | 38 | 45 | 35 | 20 | 25 | 25 | 30 |
| 426 | G426 | *Indica* | Hap-1 | 25 | 35 | 36 | 36 | 30 | 36 | 28 | 29 | 25 | 34 |
| 427 | G427 | *Japonica* | Hap-1 | 50 | 35 | 40 | 40 | 45 | 48 | 25 | 30 | 40 | 30 |
| 428 | G428 | *Indica* | Hap-2 | 40 | 45 | 35 | 35 | 46 | 36 | 36 | 38 | 40 | 40 |
| 429 | G429 | *Indica* | Hap-4 | 43 | 42 | 38 | 38 | 38 | 38 | 28 | 30 | 28 | 30 |
| 430 | G430 | *Indica* | Hap-4 | 32 | 33 | 30 | 30 | 33 | 28 | 25 | 30 | 36 | 30 |
| 431 | G431 | *Indica* | Hap-1 | 38 | 42 | 30 | 30 | 38 | 28 | 27 | 30 | 33 | 35 |
| 432 | G432 | *Indica* | Hap-4 | 35 | 36 | 30 | 30 | 37 | 62 | 58 | 48 | 58 | 67 |
| 433 | G433 | *Indica* | Hap-4 | 65 | 70 | 75 | 75 | 85 | 70 | 50 | 50 | 48 | 62 |
| 434 | G434 | *Indica* | Hap-1 | 28 | 25 | 30 | 30 | 30 | 25 | 25 | 28 | 23 | 27 |
| 435 | G435 | *Indica* | Hap-1 | 35 | 33 | 25 | 25 | 32 | 55 | 35 | 40 | 40 | 47 |
| 436 | G436 | *Indica* | Hap-4 | 0 | 0 | 0 | 0 | 0 | 0 | 0 | 0 | 0 | 0 |
| 437 | G437 | *Japonica* | Hap-2 | 40 | 40 | 34 | 34 | 45 | 25 | 35 | 30 | 33 | 35 |
| 438 | G438 | *Indica* | Hap-1 | 42 | 32 | 33 | 33 | 34 | 40 | 35 | 30 | 30 | 35 |
| 439 | G439 | *Indica* | Hap-4 | 32 | 36 | 40 | 40 | 42 | 35 | 35 | 30 | 28 | 30 |
| 440 | G440 | *Indica* | Hap-1 | 45 | 45 | 35 | 35 | 38 | 50 | 42 | 38 | 40 | 34 |
| 441 | G441 | *Indica* | Hap-1 | 40 | 38 | 50 | 50 | 50 | 35 | 35 | 30 | 32 | 34 |
| 442 | G442 | *Indica* | Hap-4 | 30 | 40 | 42 | 42 | 32 | 27 | 30 | 27 | 35 | 25 |
| 443 | G443 | *Indica* | Hap-4 | 38 | 45 | 48 | 48 | 65 | 50 | 50 | 48 | 55 | 40 |
| 444 | G444 | *Indica* | Hap-1 | 75 | 70 | 70 | 70 | 52 | 55 | 50 | 60 | 50 | 45 |
| 445 | G445 | *Indica* | Hap-4 | 48 | 45 | 42 | 42 | 40 | 37 | 40 | 40 | 40 | 35 |
| 446 | G446 | *Indica* | Hap-4 | 40 | 38 | 42 | 42 | 38 | 30 | 35 | 36 | 35 | 35 |
| 447 | G447 | *Indica* | Hap-4 | 44 | 42 | 25 | 25 | 55 | 34 | 44 | 30 | 38 | 28 |
| 448 | G448 | *Indica* | Hap-1 | 75 | 75 | 60 | 60 | 55 | 55 | 55 | 48 | 60 | 54 |
| 449 | G449 | *Indica* | Hap-4 | 55 | 50 | 45 | 45 | 48 | 35 | 40 | 32 | 28 | 40 |
| 450 | G450 | *Indica* | Hap-4 | 45 | 50 | 35 | 35 | 38 | 40 | 44 | 35 | 36 | 43 |
| 451 | G451 | *Indica* | Hap-4 | 85 | 55 | 45 | 45 | 46 | 40 | 35 | 38 | 45 | 40 |
| 452 | G452 | *Indica* | Hap-4 | 45 | 42 | 40 | 40 | 88 | 37 | 32 | 34 | 36 | 30 |
| 453 | G453 | *Indica* | Hap-4 | 84 | 80 | 55 | 55 | 39 | 40 | 38 | 40 | 58 | 55 |
| 454 | G454 | *Indica* | Hap-4 | 33 | 38 | 41 | 41 | 48 | 42 | 35 | 33 | 34 | 36 |
| 455 | G455 | *Indica* | Hap-4 | 39 | 43 | 34 | 34 | 46 | 35 | 33 | 31 | 29 | 35 |
| 456 | G456 | *Indica* | Hap-4 | 37 | 36 | 44 | 44 | 36 | 45 | 42 | 45 | 35 | 42 |
| 457 | G457 | *Indica* | *-* | 39 | 35 | 38 | 38 | 37 | 28 | 38 | 38 | 40 | 35 |
| 458 | G458 | *Indica* | Hap-4 | 33 | 30 | 34 | 34 | 30 | 40 | 35 | 32 | 34 | 36 |
| 459 | G459 | *Japonica* | Hap-1 | 48 | 38 | 42 | 42 | 30 | 37 | 40 | 35 | 38 | 33 |
| 460 | G460 | *Indica* | Hap-1 | 35 | 38 | 33 | 33 | 37 | 30 | 32 | 29 | 42 | 33 |
| 461 | G461 | *Japonica* | Hap-1 | 30 | 34 | 40 | 40 | 35 | 35 | 34 | 30 | 38 | 30 |
| 462 | G462 | *Japonica* | Hap-1 | 39 | 40 | 35 | 35 | 40 | 40 | 34 | 35 | 28 | 45 |
| 463 | G463 | *Japonica* | Hap-1 | 50 | 37 | 38 | 38 | 40 | 39 | 31 | 22 | 35 | 40 |
| 464 | G464 | *Japonica* | Hap-1 | 40 | 42 | 32 | 32 | 46 | 40 | 41 | 33 | 40 | 34 |
| 465 | G465 | *Japonica* | Hap-1 | 28 | 35 | 36 | 36 | 37 | 23 | 28 | 27 | 29 | 30 |
| 466 | G466 | *Indica* | Hap-1 | 32 | 34 | 45 | 45 | 40 | 37 | 31 | 45 | 35 | 42 |
| 467 | G467 | *Japonica* | Hap-1 | 20 | 20 | 25 | 25 | 25 | 19 | 18 | 21 | 20 | 15 |
| 468 | G468 | *Japonica* | Hap-1 | 30 | 40 | 35 | 35 | 34 | 38 | 36 | 30 | 37 | 42 |
| 469 | G469 | *Japonica* | Hap-1 | 35 | 48 | 60 | 60 | 54 | 38 | 40 | 40 | 33 | 43 |
| 470 | G470 | *Japonica* | Hap-1 | 44 | 48 | 38 | 38 | 40 | 43 | 38 | 36 | 45 | 39 |
| 471 | G471 | *Japonica* | Hap-1 | 35 | 36 | 42 | 42 | 34 | 30 | 28 | 26 | 29 | 38 |
| 472 | G472 | *Japonica* | Hap-4 | 35 | 30 | 30 | 30 | 35 | 27 | 22 | 23 | 25 | 25 |
| 473 | G473 | *Japonica* | Hap-4 | 43 | 43 | 35 | 35 | 48 | 58 | 49 | 36 | 47 | 32 |
| 474 | G474 | *Indica* | Hap-4 | 32 | 33 | 36 | 36 | 40 | 36 | 38 | 28 | 45 | 25 |
| 475 | G475 | *Indica* | Hap-4 | 45 | 51 | 75 | 75 | 58 | 48 | 38 | 43 | 39 | 49 |
| 476 | G476 | *Japonica* | Hap-3 | 51 | 55 | 53 | 53 | 50 | 50 | 43 | 48 | 46 | 50 |
| 477 | G477 | *Indica* | Hap-4 | 28 | 38 | 30 | 30 | 29 | 35 | 28 | 20 | 28 | 25 |
| 478 | G478 | *Indica* | Hap-4 | 55 | 50 | 55 | 55 | 50 | 32 | 40 | 30 | 42 | 30 |
| 479 | G479 | *Indica* | Hap-4 | *-* | *-* | *-* | *-* | *-* | *-* | *-* | *-* | *-* | *-* |
| 480 | G480 | *Indica* | Hap-4 | *-* | *-* | *-* | *-* | *-* | *-* | *-* | *-* | *-* | *-* |
| 481 | G481 | *Indica* | Hap-4 | *-* | *-* | *-* | *-* | *-* | *-* | *-* | *-* | *-* | *-* |
| 482 | G482 | *Indica* | Hap-4 | *-* | *-* | *-* | *-* | *-* | *-* | *-* | *-* | *-* | *-* |
| 483 | G483 | *Indica* | Hap-4 | *-* | *-* | *-* | *-* | *-* | *-* | *-* | *-* | *-* | *-* |
| 484 | G484 | *Indica* | Hap-1 | *-* | *-* | *-* | *-* | *-* | *-* | *-* | *-* | *-* | *-* |
| 485 | G485 | *Indica* | Hap-1 | *-* | *-* | *-* | *-* | *-* | *-* | *-* | *-* | *-* | *-* |
| 486 | G486 | *Japonica* | Hap-1 | *-* | *-* | *-* | *-* | *-* | *-* | *-* | *-* | *-* | *-* |
| 487 | G487 | *Japonica* | Hap-1 | *-* | *-* | *-* | *-* | *-* | *-* | *-* | *-* | *-* | *-* |
| 488 | G488 | *Japonica* | Hap-1 | *-* | *-* | *-* | *-* | *-* | *-* | *-* | *-* | *-* | *-* |
| 489 | G489 | *Japonica* | Hap-1 | *-* | *-* | *-* | *-* | *-* | *-* | *-* | *-* | *-* | *-* |
| 490 | G490 | *Japonica* | Hap-1 | *-* | *-* | *-* | *-* | *-* | *-* | *-* | *-* | *-* | *-* |
| 491 | G491 | *Japonica* | Hap-1 | *-* | *-* | *-* | *-* | *-* | *-* | *-* | *-* | *-* | *-* |
| 492 | G492 | *Indica* | Hap-2 | *-* | *-* | *-* | *-* | *-* | *-* | *-* | *-* | *-* | *-* |
| 493 | G493 | *Indica* | Hap-1 | *-* | *-* | *-* | *-* | *-* | *-* | *-* | *-* | *-* | *-* |
| 494 | G494 | *Japonica* | Hap-1 | *-* | *-* | *-* | *-* | *-* | *-* | *-* | *-* | *-* | *-* |
| 495 | G495 | *Japonica* | Hap-1 | *-* | *-* | *-* | *-* | *-* | *-* | *-* | *-* | *-* | *-* |
| 496 | G496 | *Japonica* | Hap-1 | *-* | *-* | *-* | *-* | *-* | *-* | *-* | *-* | *-* | *-* |
| 497 | G497 | *Japonica* | Hap-1 | *-* | *-* | *-* | *-* | *-* | *-* | *-* | *-* | *-* | *-* |
| 498 | G498 | *Japonica* | Hap-1 | *-* | *-* | *-* | *-* | *-* | *-* | *-* | *-* | *-* | *-* |
| 499 | G499 | *Japonica* | Hap-1 | *-* | *-* | *-* | *-* | *-* | *-* | *-* | *-* | *-* | *-* |
| 500 | G500 | *Japonica* | Hap-1 | *-* | *-* | *-* | *-* | *-* | *-* | *-* | *-* | *-* | *-* |
| 501 | G501 | *Japonica* | Hap-1 | *-* | *-* | *-* | *-* | *-* | *-* | *-* | *-* | *-* | *-* |
| 502 | G502 | *Japonica* | Hap-1 | *-* | *-* | *-* | *-* | *-* | *-* | *-* | *-* | *-* | *-* |
| 503 | G503 | *Japonica* | Hap-4 | *-* | *-* | *-* | *-* | *-* | *-* | *-* | *-* | *-* | *-* |
| 504 | G504 | *Indica* | Hap-4 | *-* | *-* | *-* | *-* | *-* | *-* | *-* | *-* | *-* | *-* |
| 505 | G505 | *Japonica* | Hap-4 | *-* | *-* | *-* | *-* | *-* | *-* | *-* | *-* | *-* | *-* |
| 506 | G506 | *Indica* | Hap-2 | *-* | *-* | *-* | *-* | *-* | *-* | *-* | *-* | *-* | *-* |
| 507 | G507 | *Indica* | Hap-2 | *-* | *-* | *-* | *-* | *-* | *-* | *-* | *-* | *-* | *-* |
| 508 | G508 | *Japonica* | Hap-1 | *-* | *-* | *-* | *-* | *-* | *-* | *-* | *-* | *-* | *-* |
| 509 | G509 | *Japonica* | Hap-1 | *-* | *-* | *-* | *-* | *-* | *-* | *-* | *-* | *-* | *-* |
| 510 | G510 | *Indica* | Hap-1 | *-* | *-* | *-* | *-* | *-* | *-* | *-* | *-* | *-* | *-* |
| 511 | G511 | *Japonica* | Hap-1 | *-* | *-* | *-* | *-* | *-* | *-* | *-* | *-* | *-* | *-* |
| 512 | G512 | *Japonica* | Hap-1 | *-* | *-* | *-* | *-* | *-* | *-* | *-* | *-* | *-* | *-* |
| 513 | G513 | *Indica* | Hap-4 | *-* | *-* | *-* | *-* | *-* | *-* | *-* | *-* | *-* | *-* |
| 514 | G514 | *Indica* | Hap-4 | *-* | *-* | *-* | *-* | *-* | *-* | *-* | *-* | *-* | *-* |
| 515 | G515 | *Japonica* | Hap-1 | *-* | *-* | *-* | *-* | *-* | *-* | *-* | *-* | *-* | *-* |
| 516 | G516 | *Japonica* | Hap-1 | *-* | *-* | *-* | *-* | *-* | *-* | *-* | *-* | *-* | *-* |
| 517 | G517 | *Japonica* | Hap-1 | *-* | *-* | *-* | *-* | *-* | *-* | *-* | *-* | *-* | *-* |
| 518 | G518 | *Indica* | Hap-4 | *-* | *-* | *-* | *-* | *-* | *-* | *-* | *-* | *-* | *-* |
| 519 | G519 | *Japonica* | Hap-1 | *-* | *-* | *-* | *-* | *-* | *-* | *-* | *-* | *-* | *-* |
| 520 | G520 | *Japonica* | Hap-1 | *-* | *-* | *-* | *-* | *-* | *-* | *-* | *-* | *-* | *-* |
| 521 | G521 | *Indica* | Hap-1 | *-* | *-* | *-* | *-* | *-* | *-* | *-* | *-* | *-* | *-* |
| 522 | G522 | *Indica* | Hap-1 | *-* | *-* | *-* | *-* | *-* | *-* | *-* | *-* | *-* | *-* |
| 523 | G523 | *Japonica* | Hap-4 | *-* | *-* | *-* | *-* | *-* | *-* | *-* | *-* | *-* | *-* |
| 524 | G524 | *Indica* | Hap-4 | *-* | *-* | *-* | *-* | *-* | *-* | *-* | *-* | *-* | *-* |
| 525 | G525 | *Japonica* | Hap-1 | *-* | *-* | *-* | *-* | *-* | *-* | *-* | *-* | *-* | *-* |
| 526 | G526 | *Japonica* | Hap-1 | 35 | 32 | 36 | 36 | 48 | 37 | 32 | 38 | 30 | 30 |
| 527 | G527 | *Japonica* | Hap-1 | 31 | 34 | 42 | 42 | 41 | 35 | 30 | 33 | 32 | 35 |
| 528 | G528 | *Japonica* | Hap-1 | 45 | 49 | 50 | 50 | 39 | 45 | 40 | 35 | 40 | 35 |
| 529 | G529 | *Japonica* | Hap-1 | 32 | 45 | 35 | 35 | 31 | 38 | 32 | 36 | 40 | 36 |
| 530 | G530 | *Japonica* | Hap-1 | 35 | 37 | 29 | 29 | 37 | 25 | 30 | 25 | 30 | 35 |
| 531 | G531 | *Indica* | Hap-4 | 35 | 37 | 45 | 45 | 32 | 28 | 32 | 35 | 40 | 33 |
| 532 | G532 | *Indica* | Hap-4 | 35 | 35 | 40 | 40 | 35 | 42 | 40 | 48 | 40 | 50 |
| 533 | G533 | *Japonica* | Hap-1 | 60 | 66 | 57 | 57 | 45 | 55 | 52 | 60 | 65 | 58 |
| 534 | G534 | *Indica* | Hap-1 | 39 | 37 | 38 | 38 | 30 | 42 | 48 | 40 | 45 | 48 |
| 535 | G535 | *Indica* | Hap-4 | 40 | 50 | 54 | 54 | 58 | 44 | 50 | 60 | 60 | 62 |
| 536 | G536 | *Indica* | Hap-4 | 41 | 35 | 40 | 40 | 43 | 48 | 32 | 36 | 50 | 55 |
| 537 | G537 | *Indica* | Hap-4 | 33 | 41 | 45 | 45 | 46 | 55 | 65 | 50 | 50 | 55 |
| 538 | G538 | *Indica* | Hap-5 | 41 | 56 | 48 | 48 | 55 | 46 | 33 | 30 | 32 | 35 |
| 539 | G539 | *Japonica* | Hap-2 | 40 | 37 | 27 | 27 | 36 | 40 | 30 | 35 | 37 | 35 |
| 540 | G540 | *Indica* | Hap-4 | 33 | 50 | 40 | 40 | 40 | 40 | 55 | 65 | 63 | 62 |
| 541 | G541 | *Japonica* | Hap-1 | 25 | 28 | 29 | 29 | 60 | 38 | 38 | 40 | 25 | 25 |
| 542 | G542 | *Japonica* | Hap-1 | 34 | 35 | 38 | 38 | 37 | 45 | 42 | 38 | 39 | 43 |
| 543 | G543 | *Japonica* | Hap-1 | 34 | 54 | 40 | 40 | 40 | 50 | 45 | 58 | 58 | 50 |
| 544 | G544 | *Indica* | Hap-2 | 23 | 32 | 24 | 24 | 28 | 21 | 20 | 18 | 18 | 24 |
| 545 | G545 | *Japonica* | Hap-4 | 36 | 38 | 28 | 28 | 33 | 0 | 0 | 0 | 0 | 0 |
| 546 | G546 | *Indica* | Hap-4 | 33 | 38 | 44 | 44 | 42 | 43 | 36 | 48 | 45 | 48 |
| 547 | G547 | *Japonica* | Hap-1 | 37 | 28 | 32 | 32 | 43 | 30 | 35 | 34 | 35 | 32 |
| 548 | G548 | *Indica* | Hap-4 | 38 | 44 | 42 | 42 | 52 | 45 | 44 | 48 | 45 | 38 |
| 549 | G549 | *Japonica* | Hap-1 | 36 | 38 | 41 | 41 | 44 | 48 | 40 | 44 | 35 | 35 |
| 550 | G550 | *Indica* | Hap-4 | 38 | 40 | 40 | 40 | 43 | 50 | 52 | 53 | 48 | 44 |
| 551 | G551 | *Indica* | Hap-4 | 26 | 35 | 35 | 35 | 40 | 35 | 33 | 33 | 35 | 42 |
| 552 | G552 | *Indica* | Hap-2 | 52 | 38 | 77 | 77 | 67 | 50 | 80 | 65 | 80 | 85 |
| 553 | G553 | *Indica* | Hap-3 | 38 | 50 | 51 | 51 | 47 | 48 | 55 | 45 | 55 | 56 |
| 554 | G554 | *Indica* | Hap-4 | 55 | 40 | 65 | 65 | 50 | 50 | 48 | 48 | 50 | 53 |
| 555 | G555 | *Indica* | Hap-4 | 45 | 55 | 53 | 53 | 55 | 38 | 35 | 36 | 42 | 42 |
| 556 | G556 | *Indica* | Hap-4 | 40 | 45 | 42 | 42 | 40 | 40 | 38 | 55 | 48 | 60 |
| 557 | G557 | *Indica* | Hap-4 | 35 | 36 | 40 | 40 | 35 | 45 | 40 | 38 | 30 | 30 |
| 558 | G558 | *Japonica* | Hap-1 | 40 | 27 | 30 | 30 | 30 | 35 | 45 | 32 | 30 | 30 |
| 559 | G559 | *Indica* | Hap-4 | 38 | 34 | 37 | 37 | 30 | 37 | 40 | 30 | 40 | 33 |
| 560 | G560 | *Japonica* | Hap-1 | 30 | 20 | 26 | 26 | 33 | 30 | 38 | 28 | 35 | 35 |
| 561 | G561 | *Japonica* | Hap-1 | 36 | 27 | 31 | 31 | 45 | 32 | 38 | 45 | 45 | 49 |
| 562 | G562 | *Japonica* | Hap-1 | 35 | 30 | 34 | 34 | 30 | 32 | 28 | 32 | 22 | 20 |
| 563 | G563 | *Indica* | Hap-2 | 32 | 37 | 33 | 33 | 36 | 36 | 46 | 35 | 38 | 39 |
| 564 | G564 | *Indica* | Hap-4 | 35 | 45 | 32 | 32 | 38 | 38 | 39 | 44 | 41 | 40 |
| 565 | G565 | *Japonica* | Hap-1 | 28 | 33 | 28 | 28 | 40 | 45 | 35 | 37 | 40 | 30 |
| 566 | G566 | *Indica* | Hap-4 | 34 | 30 | 27 | 27 | 28 | 34 | 50 | 35 | 33 | 30 |
| 567 | G567 | *Japonica* | Hap-1 | 42 | 28 | 38 | 38 | 38 | 0 | 0 | 0 | 0 | 0 |
| 568 | G568 | *Japonica* | Hap-1 | 37 | 37 | 38 | 38 | 38 | 40 | 25 | 35 | 35 | 40 |
| 569 | G569 | *Japonica* | Hap-1 | 29 | 30 | 25 | 25 | 30 | 40 | 35 | 35 | 48 | 48 |
| 570 | G570 | *Indica* | Hap-4 | 42 | 40 | 38 | 38 | 35 | 38 | 40 | 46 | 38 | 35 |
| 571 | G571 | *Indica* | Hap-4 | 40 | 52 | 55 | 55 | 48 | 50 | 55 | 56 | 55 | 61 |
| 572 | G572 | *Indica* | Hap-4 | 30 | 40 | 38 | 38 | 34 | 35 | 35 | 36 | 56 | 46 |
| 573 | G573 | *Indica* | Hap-4 | 58 | 38 | 36 | 36 | 42 | 55 | 35 | 65 | 60 | 30 |
| 574 | G574 | *Japonica* | Hap-1 | 35 | 35 | 36 | 36 | 42 | 36 | 37 | 41 | 32 | 38 |
| 575 | G575 | *Japonica* | Hap-1 | 27 | 40 | 34 | 34 | 41 | 40 | 43 | 40 | 44 | 45 |
| 576 | G576 | *Japonica* | Hap-1 | 32 | 27 | 35 | 35 | 38 | 23 | 30 | 25 | 20 | 25 |
| 577 | G577 | *Japonica* | Hap-1 | 35 | 29 | 34 | 34 | 35 | 39 | 39 | 44 | 44 | 36 |
| 578 | G578 | *Japonica* | Hap-1 | 36 | 37 | 40 | 40 | 40 | 42 | 65 | 48 | 45 | 50 |
| 579 | G579 | *Indica* | Hap-4 | 54 | 70 | 78 | 78 | 63 | 90 | 78 | 85 | 70 | 80 |
| 580 | G580 | *Indica* | Hap-4 | 82 | 77 | 68 | 68 | 60 | 37 | 45 | 51 | 66 | 57 |
| 581 | G581 | *Indica* | Hap-4 | 42 | 43 | 45 | 45 | 63 | 50 | 55 | 50 | 55 | 45 |
| 582 | G582 | *Indica* | Hap-4 | 55 | 58 | 54 | 54 | 63 | 41 | 45 | 45 | 48 | 50 |
| 583 | G583 | *Indica* | Hap-4 | 42 | 50 | 30 | 30 | 45 | 41 | 55 | 48 | 40 | 45 |
| 584 | G584 | *Indica* | Hap-4 | 40 | 51 | 46 | 46 | 45 | 65 | 64 | 55 | 52 | 52 |
| 585 | G585 | *Indica* | Hap-4 | 28 | 30 | 25 | 25 | 32 | 46 | 54 | 40 | 62 | 48 |
| 586 | G586 | *Indica* | Hap-3 | 29 | 40 | 38 | 38 | 35 | 38 | 25 | 25 | 25 | 28 |
| 587 | G587 | *Japonica* | Hap-1 | 38 | 32 | 32 | 32 | 30 | 42 | 45 | 45 | 30 | 35 |
| 588 | G588 | *Indica* | Hap-4 | 45 | 55 | 61 | 61 | 45 | 72 | 63 | 70 | 70 | 73 |
| 589 | G589 | *Japonica* | Hap-1 | 51 | 55 | 48 | 48 | 38 | 45 | 44 | 48 | 60 | 48 |
| 590 | G590 | *Japonica* | Hap-1 | 41 | 34 | 35 | 35 | 30 | 28 | 37 | 30 | 30 | 30 |
| 591 | G591 | *Japonica* | Hap-1 | 38 | 37 | 36 | 36 | 30 | 30 | 25 | 45 | 42 | 35 |
| 592 | G592 | *Japonica* | Hap-1 | 40 | 38 | 31 | 31 | 32 | 36 | 38 | 40 | 35 | 35 |
| 593 | G593 | *Indica* | Hap-5 | 44 | 47 | 39 | 39 | 47 | 38 | 50 | 35 | 50 | 52 |
| 594 | G594 | *Indica* | Hap-4 | 47 | 52 | 52 | 52 | 44 | 50 | 48 | 56 | 50 | 55 |
| 595 | G595 | *Indica* | Hap-4 | 53 | 38 | 44 | 44 | 60 | 40 | 35 | 30 | 40 | 45 |
| 596 | G596 | *Indica* | Hap-4 | 45 | 65 | 66 | 66 | 45 | 50 | 60 | 48 | 38 | 56 |
| 597 | G597 | *Indica* | Hap-5 | 68 | 50 | 57 | 57 | 65 | 70 | 65 | 55 | 50 | 55 |
| 598 | G598 | *Japonica* | Hap-1 | 58 | 68 | 65 | 65 | 58 | 50 | 56 | 52 | 57 | 60 |
| 599 | G599 | *Indica* | Hap-4 | 38 | 33 | 48 | 48 | 60 | 68 | 62 | 52 | 50 | 65 |
| 600 | G600 | *Indica* | Hap-4 | 42 | 33 | 47 | 47 | 44 | 35 | 32 | 38 | 43 | 40 |
| 601 | G601 | *Indica* | Hap-4 | 40 | 56 | 61 | 61 | 60 | 30 | 34 | 32 | 38 | 42 |
| 602 | G602 | *Indica* | Hap-4 | 38 | 44 | 52 | 52 | 44 | 45 | 46 | 50 | 45 | 40 |
| 603 | G603 | *Japonica* | Hap-4 | 32 | 55 | 54 | 54 | 50 | 45 | 43 | 51 | 43 | 40 |
| 604 | G604 | *Indica* | Hap-4 | 41 | 37 | 40 | 40 | 42 | 46 | 50 | 40 | 43 | 38 |
| 605 | G605 | *Japonica* | Hap-1 | 38 | 28 | 32 | 32 | 53 | 55 | 36 | 45 | 53 | 48 |
| 606 | G606 | *Indica* | Hap-4 | 51 | 62 | 70 | 70 | 90 | 65 | 60 | 60 | 63 | 60 |
| 607 | G607 | *Indica* | Hap-4 | 70 | 78 | 58 | 58 | 45 | 70 | 67 | 50 | 48 | 58 |
| 608 | G608 | *Indica* | Hap-1 | 43 | 45 | 48 | 48 | 50 | 53 | 53 | 50 | 48 | 49 |
| 609 | G609 | *Indica* | Hap-1 | 55 | 68 | 57 | 57 | 70 | 58 | 72 | 55 | 65 | 68 |
| 610 | G610 | *Indica* | Hap-1 | 39 | 49 | 42 | 42 | 38 | 35 | 40 | 32 | 30 | 40 |
| 611 | G611 | *Indica* | Hap-3 | 47 | 50 | 48 | 48 | 45 | 48 | 48 | 46 | 43 | 35 |
| 612 | G612 | *Indica* | Hap-1 | 20 | 25 | 30 | 30 | 18 | 30 | 25 | 28 | 25 | 30 |
| 613 | G613 | *Indica* | Hap-2 | 57 | 57 | 55 | 55 | 59 | 50 | 50 | 49 | 45 | 50 |
| 614 | G614 | *Indica* | Hap-4 | 36 | 45 | 38 | 38 | 44 | 58 | 52 | 54 | 65 | 48 |
| 615 | G615 | *Indica* | Hap-1 | 49 | 52 | 53 | 53 | 0 | 0 | 0 | 0 | 0 | 0 |
| 616 | G616 | *Indica* | Hap-1 | 60 | 60 | 55 | 55 | 50 | 55 | 45 | 44 | 67 | 45 |
| 617 | G617 | *Japonica* | Hap-1 | 30 | 19 | 29 | 29 | 30 | 26 | 31 | 24 | 30 | 30 |
| 618 | G618 | *Japonica* | Hap-1 | 40 | 20 | 41 | 41 | 36 | 30 | 35 | 28 | 31 | 32 |
| 619 | G619 | *Japonica* | Hap-1 | 37 | 45 | 34 | 34 | 35 | 38 | 24 | 36 | 38 | 36 |
| 620 | G620 | *Japonica* | Hap-1 | 37 | 35 | 28 | 28 | 25 | 33 | 23 | 34 | 37 | 47 |
| 621 | G621 | *Indica* | Hap-4 | 58 | 50 | 53 | 53 | 54 | 51 | 45 | 48 | 46 | 51 |
| 622 | G622 | *Indica* | Hap-4 | 48 | 39 | 50 | 50 | 51 | 49 | 65 | 48 | 40 | 50 |
| 623 | G623 | *Indica* | Hap-1 | 25 | 35 | 36 | 36 | 35 | 40 | 38 | 42 | 28 | 37 |
| 624 | G624 | *Indica* | Hap-4 | 57 | 67 | 60 | 60 | 48 | 70 | 50 | 50 | 48 | 72 |
| 625 | G625 | *Indica* | Hap-1 | 28 | 34 | 39 | 39 | 35 | 40 | 38 | 35 | 35 | 35 |
| 626 | G626 | *Japonica* | Hap-1 | 38 | 37 | 39 | 39 | 30 | 40 | 40 | 35 | 40 | 40 |
| 627 | G627 | *Japonica* | Hap-1 | 44 | 40 | 50 | 50 | 30 | 35 | 55 | 40 | 40 | 45 |
| 628 | G628 | *Japonica* | Hap-1 | 40 | 40 | 44 | 44 | 43 | 45 | 0 | 0 | 0 | 0 |
| 629 | G629 | *Indica* | Hap-4 | 46 | 38 | 48 | 48 | 41 | 45 | 35 | 35 | 55 | 42 |
| 630 | G630 | *Indica* | Hap-4 | 58 | 68 | 68 | 68 | 67 | 55 | 40 | 45 | 58 | 50 |
| 631 | G631 | *Indica* | Hap-4 | 42 | 30 | 33 | 33 | 49 | 40 | 48 | 50 | 45 | 45 |
| 632 | G632 | *Indica* | Hap-4 | 38 | 40 | 39 | 39 | 40 | 34 | 43 | 42 | 36 | 36 |
| 633 | G633 | *Indica* | Hap-4 | 31 | 35 | 50 | 50 | 50 | 45 | 48 | 48 | 55 | 48 |
| 634 | G634 | *Japonica* | Hap-1 | 48 | 37 | 30 | 30 | 34 | 30 | 38 | 28 | 30 | 35 |
| 635 | G635 | *Indica* | Hap-4 | 50 | 45 | 37 | 37 | 45 | 45 | 42 | 35 | 48 | 40 |
| 636 | G636 | *Indica* | Hap-4 | 55 | 58 | 40 | 40 | 54 | 63 | 50 | 55 | 53 | 54 |
| 637 | G637 | *Indica* | Hap-4 | 46 | 41 | 47 | 47 | 40 | 45 | 50 | 35 | 40 | 55 |
| 638 | G638 | *Indica* | Hap-4 | 38 | 45 | 36 | 36 | 36 | 40 | 32 | 40 | 40 | 36 |
| 639 | G639 | *Japonica* | Hap-1 | 64 | 66 | 67 | 67 | 68 | 50 | 55 | 35 | 30 | 58 |
| 640 | G640 | *Indica* | Hap-4 | 64 | 66 | 67 | 67 | 60 | 36 | 60 | 45 | 58 | 55 |
| 641 | G641 | *Japonica* | Hap-1 | 40 | 40 | 45 | 45 | 45 | 36 | 37 | 38 | 35 | 36 |
| 642 | G642 | *Indica* | Hap-4 | 50 | 65 | 48 | 48 | 50 | 47 | 38 | 40 | 40 | 60 |
| 643 | G643 | *Indica* | Hap-4 | 55 | 58 | 49 | 49 | 55 | 34 | 38 | 48 | 60 | 50 |
| 644 | G644 | *Indica* | Hap-4 | 67 | 65 | 58 | 58 | 55 | 55 | 60 | 50 | 65 | 63 |
| 645 | G645 | *Indica* | Hap-4 | 0 | 0 | 0 | 0 | 0 | 0 | 0 | 0 | 0 | 0 |
| 646 | G646 | *Indica* | Hap-4 | 35 | 46 | 40 | 40 | 32 | 39 | 33 | 40 | 39 | 50 |
| 647 | G647 | *Indica* | Hap-4 | 65 | 60 | 60 | 60 | 50 | 38 | 40 | 40 | 40 | 50 |
| 648 | G648 | *Indica* | Hap-4 | 65 | 45 | 58 | 58 | 48 | 58 | 48 | 50 | 45 | 50 |
| 649 | G649 | *Indica* | Hap-4 | 50 | 55 | 60 | 60 | 63 | 40 | 55 | 45 | 45 | 48 |
| 650 | G650 | *Indica* | Hap-4 | 43 | 68 | 72 | 72 | 45 | 52 | 55 | 55 | 62 | 55 |
| 651 | G651 | *Japonica* | Hap-1 | 34 | 30 | 24 | 24 | 20 | 35 | 25 | 40 | 28 | 25 |
| 652 | G652 | *Indica* | Hap-4 | 67 | 65 | 70 | 70 | 60 | 60 | 40 | 48 | 51 | 60 |
| 653 | G653 | *Japonica* | Hap-1 | 28 | 20 | 20 | 20 | 23 | 38 | 35 | 28 | 34 | 35 |
| 654 | G654 | *Indica* | Hap-4 | 58 | 60 | 55 | 55 | 65 | 40 | 35 | 34 | 38 | 40 |
| 655 | G655 | *Indica* | Hap-3 | 27 | 38 | 32 | 32 | 43 | 40 | 42 | 38 | 32 | 33 |
| 656 | G656 | *Indica* | Hap-2 | 45 | 48 | 55 | 55 | 55 | 32 | 38 | 40 | 45 | 49 |
| 657 | G657 | *Indica* | Hap-4 | 56 | 53 | 52 | 52 | 55 | 47 | 50 | 55 | 60 | 50 |
| 658 | G658 | *Japonica* | Hap-1 | 38 | 40 | 35 | 35 | 28 | 18 | 25 | 32 | 19 | 20 |
| 659 | G659 | *Japonica* | Hap-4 | 35 | 38 | 37 | 37 | 51 | 35 | 34 | 48 | 29 | 30 |
| 660 | G660 | *Japonica* | Hap-1 | 45 | 47 | 38 | 38 | 45 | 40 | 35 | 48 | 55 | 50 |
| 661 | G661 | *Japonica* | Hap-1 | 40 | 35 | 45 | 45 | 47 | 45 | 50 | 45 | 35 | 38 |
| 662 | G662 | *Indica* | Hap-5 | 32 | 35 | 42 | 42 | 30 | 35 | 48 | 40 | 50 | 48 |
| 663 | G663 | *Indica* | Hap-4 | 38 | 41 | 38 | 38 | 36 | 40 | 40 | 38 | 33 | 38 |
| 664 | G664 | *Indica* | Hap-4 | 60 | 75 | 58 | 58 | 70 | 50 | 58 | 40 | 34 | 40 |
| 665 | G665 | *Japonica* | Hap-1 | 30 | 38 | 30 | 30 | 34 | 45 | 35 | 30 | 28 | 28 |
| 666 | G666 | *Indica* | Hap-4 | 80 | 83 | 78 | 78 | 70 | 70 | 72 | 71 | 72 | 70 |
| 667 | G667 | *Indica* | Hap-4 | 44 | 40 | 50 | 50 | 54 | 45 | 40 | 45 | 38 | 60 |
| 668 | G668 | *Indica* | Hap-4 | 55 | 45 | 56 | 56 | 45 | 45 | 50 | 40 | 58 | 60 |
| 669 | G669 | *Japonica* | Hap-2 | 43 | 38 | 40 | 40 | 45 | 25 | 30 | 35 | 36 | 55 |
| 670 | G670 | *Indica* | Hap-2 | 42 | 35 | 30 | 30 | 32 | 32 | 45 | 20 | 38 | 32 |
| 671 | G671 | *Japonica* | Hap-2 | 43 | 50 | 50 | 50 | 35 | 46 | 40 | 50 | 25 | 48 |
| 672 | G672 | *Indica* | Hap-1 | 58 | 65 | 50 | 50 | 55 | 72 | 68 | 65 | 65 | 64 |
| 673 | G673 | *Indica* | Hap-4 | 67 | 60 | 50 | 50 | 48 | 40 | 62 | 50 | 60 | 55 |
| 674 | G674 | *Indica* | Hap-4 | 21 | 38 | 45 | 45 | 52 | 46 | 42 | 35 | 51 | 60 |
| 675 | G675 | *Indica* | Hap-2 | 38 | 30 | 25 | 25 | 33 | 35 | 34 | 40 | 28 | 31 |
| 676 | G676 | *Indica* | Hap-1 | 48 | 45 | 40 | 40 | 45 | 35 | 48 | 34 | 38 | 35 |
| 677 | G677 | *Japonica* | Hap-1 | 35 | 42 | 45 | 45 | 40 | 35 | 28 | 30 | 28 | 35 |
| 678 | G678 | *Japonica* | Hap-1 | 30 | 30 | 25 | 25 | 40 | 40 | 35 | 45 | 40 | 50 |
| 679 | G679 | *Japonica* | Hap-1 | 28 | 35 | 30 | 30 | 25 | 35 | 45 | 50 | 35 | 35 |
| 680 | G680 | *Indica* | Hap-4 | 65 | 55 | 65 | 65 | 58 | 60 | 60 | 65 | 68 | 65 |
| 681 | G681 | *Indica* | Hap-4 | 57 | 50 | 45 | 45 | 45 | 55 | 48 | 50 | 55 | 53 |
| 682 | G682 | *Indica* | Hap-1 | 28 | 45 | 50 | 50 | 55 | 40 | 50 | 53 | 55 | 50 |
| 683 | G683 | *Japonica* | *-* | 30 | 25 | 40 | 40 | 38 | 37 | 28 | 38 | 32 | 35 |
| 684 | G684 | *Japonica* | Hap-1 | 40 | 37 | 40 | 40 | 55 | 0 | 0 | 0 | 0 | 0 |
| 685 | G685 | *Japonica* | Hap-1 | 19 | 34 | 44 | 44 | 31 | 25 | 30 | 30 | 28 | 25 |
| 686 | G686 | *Japonica* | Hap-1 | 36 | 45 | 45 | 45 | 48 | 45 | 35 | 38 | 25 | 30 |
| 687 | G687 | *Japonica* | Hap-1 | 37 | 28 | 38 | 38 | 30 | 41 | 42 | 43 | 40 | 35 |
| 688 | G688 | *Japonica* | Hap-1 | 35 | 33 | 21 | 21 | 33 | 28 | 26 | 30 | 30 | 30 |
| 689 | G689 | *Japonica* | Hap-1 | 36 | 22 | 25 | 25 | 50 | 60 | 45 | 40 | 30 | 48 |
| 690 | G690 | *Indica* | Hap-1 | 28 | 33 | 27 | 27 | 30 | 38 | 30 | 25 | 20 | 24 |
| 691 | G691 | *Japonica* | Hap-1 | 26 | 35 | 30 | 30 | 34 | 35 | 34 | 32 | 38 | 38 |
| 692 | G692 | *Indica* | Hap-4 | 68 | 37 | 36 | 36 | 40 | 31 | 28 | 31 | 36 | 44 |
| 693 | G693 | *Indica* | Hap-4 | 36 | 30 | 30 | 30 | 33 | 31 | 30 | 28 | 21 | 26 |
| 694 | G694 | *Japonica* | Hap-1 | 39 | 45 | 27 | 27 | 26 | 30 | 45 | 45 | 39 | 40 |
| 695 | G695 | *Japonica* | Hap-1 | 32 | 31 | 34 | 34 | 36 | 30 | 35 | 31 | 30 | 32 |
| 696 | G696 | *Indica* | Hap-4 | 43 | 52 | 52 | 52 | 53 | 45 | 50 | 45 | 54 | 51 |
| 697 | G697 | *Indica* | Hap-4 | 42 | 35 | 38 | 38 | 51 | 42 | 40 | 43 | 40 | 38 |
| 698 | G698 | *Indica* | Hap-4 | 55 | 48 | 50 | 50 | 48 | 50 | 45 | 38 | 35 | 46 |
| 699 | G699 | *Japonica* | Hap-1 | 43 | 40 | 38 | 38 | 38 | 37 | 40 | 50 | 35 | 55 |
| 700 | G700 | *Japonica* | Hap-1 | 35 | 28 | 32 | 32 | 40 | 48 | 32 | 38 | 30 | 27 |
| 701 | G701 | *Japonica* | Hap-1 | 48 | 36 | 60 | 60 | 40 | 41 | 28 | 65 | 50 | 40 |
| 702 | G702 | *Japonica* | Hap-1 | 21 | 32 | 24 | 24 | 36 | 35 | 30 | 27 | 32 | 35 |
| 703 | G703 | *Indica* | Hap-4 | 0 | 0 | 0 | 0 | 0 | 0 | 0 | 0 | 0 | 0 |
| 704 | G704 | *Indica* | Hap-1 | 32 | 28 | 32 | 32 | 25 | 24 | 32 | 28 | 23 | 23 |
| 705 | G705 | *Indica* | Hap-4 | 40 | 40 | 45 | 45 | 40 | 50 | 48 | 38 | 40 | 40 |
| 706 | G706 | *Indica* | Hap-4 | 33 | 43 | 40 | 40 | 37 | 38 | 38 | 44 | 46 | 36 |
| 707 | G707 | *Japonica* | Hap-1 | 36 | 31 | 0 | 0 | 0 | 0 | 0 | 0 | 0 | 0 |
| 708 | G708 | *Indica* | Hap-4 | 35 | 25 | 30 | 30 | 38 | 48 | 38 | 42 | 28 | 28 |
| 709 | G709 | *Indica* | Hap-4 | 43 | 44 | 48 | 48 | 40 | 38 | 48 | 31 | 35 | 48 |
| 710 | G710 | *Japonica* | Hap-1 | 27 | 30 | 30 | 30 | 38 | 31 | 30 | 29 | 25 | 28 |
| 711 | G711 | *Indica* | Hap-4 | 36 | 26 | 28 | 28 | 30 | 32 | 32 | 28 | 30 | 30 |
| 712 | G712 | *Indica* | Hap-4 | 35 | 28 | 32 | 32 | 40 | 35 | 36 | 40 | 35 | 45 |
| 713 | G713 | *Indica* | Hap-1 | 60 | 40 | 35 | 35 | 52 | 45 | 53 | 50 | 35 | 60 |
| 714 | G714 | *Indica* | Hap-1 | 39 | 34 | 30 | 30 | 30 | 35 | 30 | 25 | 38 | 40 |
| 715 | G715 | *Japonica* | Hap-1 | 38 | 33 | 30 | 30 | 32 | 30 | 35 | 25 | 20 | 24 |
| 716 | G716 | *Japonica* | Hap-1 | 25 | 32 | 26 | 26 | 38 | 35 | 25 | 37 | 37 | 20 |
| 717 | G717 | *Indica* | Hap-4 | 50 | 42 | 55 | 55 | 50 | 52 | 58 | 48 | 52 | 45 |
| 718 | G718 | *Indica* | Hap-4 | 49 | 47 | 45 | 45 | 58 | 65 | 55 | 68 | 50 | 65 |
| 719 | G719 | *Indica* | Hap-4 | 42 | 46 | 47 | 47 | 48 | 48 | 52 | 35 | 40 | 51 |
| 720 | G720 | *Japonica* | Hap-1 | 46 | 30 | 38 | 38 | 42 | 45 | 55 | 38 | 48 | 33 |
| 721 | G721 | *Indica* | Hap-4 | 57 | 51 | 50 | 50 | 57 | 43 | 48 | 46 | 38 | 40 |
| 722 | G722 | *Indica* | Hap-4 | 40 | 53 | 48 | 48 | 46 | 50 | 60 | 58 | 40 | 45 |
| 723 | G723 | *Japonica* | Hap-1 | 35 | 28 | 33 | 33 | 45 | 28 | 30 | 28 | 29 | 38 |
| 724 | G724 | *Indica* | Hap-4 | 50 | 56 | 56 | 56 | 64 | 55 | 52 | 40 | 52 | 53 |
| 725 | G725 | *Indica* | Hap-4 | 37 | 39 | 35 | 35 | 31 | 27 | 42 | 35 | 38 | 42 |
| 726 | G726 | *Japonica* | Hap-1 | 40 | 45 | 38 | 38 | 48 | 33 | 25 | 30 | 25 | 38 |
| 727 | G727 | *Indica* | Hap-1 | 49 | 37 | 37 | 37 | 65 | 48 | 46 | 50 | 50 | 54 |
| 728 | G728 | *Indica* | Hap-4 | 60 | 45 | 48 | 48 | 62 | 38 | 42 | 65 | 75 | 65 |
| 729 | G729 | *Indica* | Hap-4 | 50 | 48 | 56 | 56 | 56 | 49 | 43 | 53 | 50 | 48 |
| 730 | G730 | *Japonica* | Hap-1 | 32 | 42 | 38 | 38 | 45 | 25 | 23 | 28 | 30 | 35 |
| 731 | G731 | *Indica* | Hap-4 | 50 | 40 | 60 | 60 | 60 | 45 | 45 | 48 | 57 | 60 |
| 732 | G732 | *Japonica* | Hap-1 | 26 | 38 | 30 | 30 | 40 | 40 | 45 | 35 | 50 | 51 |
| 733 | G733 | *Japonica* | Hap-1 | 48 | 0 | 0 | 0 | 0 | 0 | 0 | 0 | 0 | 0 |
| 734 | G734 | *Indica* | Hap-4 | 50 | 40 | 44 | 44 | 48 | 35 | 55 | 51 | 50 | 40 |
| 735 | G735 | *Japonica* | Hap-1 | 39 | 45 | 30 | 30 | 30 | 30 | 31 | 29 | 33 | 35 |
| 736 | G736 | *Indica* | Hap-1 | 48 | 54 | 44 | 44 | 47 | 36 | 48 | 37 | 40 | 58 |
| 737 | G737 | *Japonica* | Hap-1 | 38 | 30 | 38 | 38 | 45 | 60 | 55 | 35 | 30 | 40 |
| 738 | G738 | *Indica* | Hap-4 | 55 | 60 | 60 | 60 | 63 | 46 | 48 | 48 | 47 | 60 |
| 739 | G739 | *Indica* | Hap-4 | 60 | 45 | 45 | 45 | 45 | 36 | 48 | 30 | 48 | 56 |
| 740 | G740 | *Indica* | Hap-4 | 40 | 35 | 28 | 28 | 40 | 35 | 33 | 48 | 38 | 45 |
| 741 | G741 | *Indica* | Hap-4 | 42 | 38 | 37 | 37 | 43 | 35 | 37 | 40 | 40 | 32 |
| 742 | G742 | *Japonica* | Hap-1 | 50 | 28 | 32 | 32 | 35 | 40 | 30 | 35 | 35 | 40 |
| 743 | G743 | *Japonica* | Hap-1 | 25 | 34 | 27 | 27 | 31 | 48 | 45 | 45 | 50 | 35 |
| 744 | G744 | *Indica* | Hap-1 | 55 | 56 | 57 | 57 | 58 | 45 | 28 | 35 | 35 | 40 |
| 745 | G745 | *Indica* | Hap-4 | 65 | 63 | 65 | 65 | 60 | 50 | 36 | 40 | 30 | 38 |
| 746 | G746 | *Japonica* | Hap-1 | 35 | 35 | 33 | 33 | 30 | 30 | 25 | 32 | 33 | 38 |
| 747 | G747 | *Japonica* | Hap-1 | 48 | 50 | 50 | 50 | 45 | 30 | 35 | 35 | 40 | 38 |
| 748 | G748 | *Indica* | Hap-4 | 27 | 28 | 40 | 40 | 35 | 43 | 33 | 46 | 45 | 40 |
| 749 | G749 | *Indica* | Hap-4 | 65 | 55 | 58 | 58 | 70 | 60 | 65 | 60 | 55 | 58 |
| 750 | G750 | *Indica* | Hap-4 | 58 | 38 | 64 | 64 | 60 | 38 | 60 | 40 | 48 | 65 |
| 751 | G751 | *Japonica* | Hap-1 | 25 | 30 | 23 | 23 | 23 | 30 | 30 | 32 | 25 | 25 |
| 752 | G752 | *Indica* | Hap-4 | 55 | 60 | 50 | 50 | 54 | 55 | 50 | 55 | 53 | 48 |
| 753 | G753 | *Indica* | Hap-2 | 60 | 62 | 58 | 58 | 55 | 44 | 40 | 25 | 41 | 43 |
| 754 | G754 | *Indica* | Hap-4 | 65 | 48 | 65 | 65 | 45 | 40 | 38 | 50 | 50 | 51 |
| 755 | G755 | *Indica* | Hap-4 | 58 | 58 | 70 | 70 | 65 | 52 | 52 | 48 | 60 | 60 |
| 756 | G756 | *Japonica* | Hap-1 | 53 | 53 | 48 | 48 | 60 | 55 | 45 | 50 | 58 | 40 |
| 757 | G757 | *Indica* | Hap-1 | 48 | 58 | 40 | 40 | 40 | 46 | 51 | 40 | 52 | 48 |
| 758 | G758 | *Indica* | Hap-4 | 72 | 60 | 60 | 60 | 60 | 55 | 72 | 88 | 82 | 80 |
| 759 | G759 | *Indica* | Hap-4 | 85 | 60 | 65 | 65 | 75 | 86 | 89 | 92 | 105 | 100 |
| 760 | G760 | *Indica* | Hap-4 | 60 | 55 | 58 | 58 | 48 | 68 | 75 | 74 | 71 | 73 |
| 761 | G761 | *Japonica* | Hap-1 | 40 | 38 | 37 | 37 | 35 | 50 | 40 | 38 | 38 | 40 |
| 762 | G762 | *Indica* | Hap-4 | 45 | 60 | 40 | 40 | 65 | 35 | 40 | 32 | 35 | 30 |
| 763 | G763 | *Indica* | Hap-1 | 40 | 45 | 38 | 38 | 43 | 30 | 50 | 45 | 43 | 35 |
| 764 | G764 | *Indica* | Hap-4 | 65 | 48 | 65 | 65 | 65 | 55 | 50 | 55 | 65 | 70 |
| 765 | G765 | *Japonica* | Hap-1 | 35 | 35 | 30 | 30 | 35 | 35 | 25 | 30 | 27 | 25 |
| 766 | G766 | *Indica* | Hap-4 | 52 | 42 | 58 | 58 | 65 | 50 | 48 | 56 | 55 | 58 |
| 767 | G767 | *Indica* | Hap-4 | 65 | 70 | 50 | 50 | 40 | 50 | 55 | 58 | 50 | 65 |
| 768 | G768 | *Japonica* | Hap-1 | 18 | 21 | 22 | 22 | 23 | 48 | 30 | 40 | 35 | 30 |
| 769 | G769 | *Indica* | Hap-4 | *-* | *-* | *-* | *-* | *-* | *-* | *-* | *-* | *-* | *-* |
| 770 | G770 | *Indica* | Hap-1 | 31 | 55 | 45 | 45 | 42 | 65 | 50 | 58 | 40 | 45 |
| 771 | G771 | *Japonica* | Hap-1 | 35 | 38 | 40 | 40 | 38 | 40 | 42 | 45 | 38 | 39 |
| 772 | G772 | *Indica* | Hap-1 | 19 | 29 | 38 | 38 | 36 | 50 | 40 | 35 | 38 | 46 |
| 773 | G773 | *Japonica* | Hap-2 | 26 | 27 | 24 | 24 | 28 | 35 | 40 | 35 | 41 | 38 |
| 774 | G774 | *Japonica* | Hap-1 | 18 | 22 | 35 | 35 | 28 | 0 | 0 | 0 | 0 | 0 |
| 775 | G775 | *Japonica* | *-* | *-* | *-* | *-* | *-* | *-* | *-* | *-* | *-* | *-* | *-* |
| 776 | G776 | *Japonica* | Hap-1 | 37 | 38 | 35 | 35 | 36 | 0 | 0 | 0 | 0 | 0 |
| 777 | G777 | *Indica* | Hap-2 | 52 | 55 | 58 | 58 | 42 | 76 | 62 | 60 | 60 | 55 |
| 778 | G778 | *Indica* | Hap-4 | 47 | 56 | 47 | 47 | 60 | 45 | 48 | 50 | 55 | 60 |
| 779 | G779 | *Indica* | *-* | 30 | 38 | 42 | 42 | 30 | 40 | 42 | 32 | 45 | 48 |
| 780 | G780 | *Indica* | *-* | 55 | 54 | 50 | 50 | 50 | 66 | 68 | 58 | 72 | 58 |
| 781 | G781 | *Japonica* | Hap-1 | 38 | 36 | 23 | 23 | 30 | 33 | 30 | 26 | 35 | 30 |
| 782 | G782 | *Japonica* | *-* | 44 | 39 | 28 | 28 | 26 | 42 | 32 | 22 | 44 | 45 |
| 783 | G783 | *Indica* | Hap-1 | 46 | 35 | 38 | 38 | 30 | 35 | 32 | 40 | 35 | 45 |
| 784 | G784 | *Indica* | Hap-4 | *-* | *-* | *-* | *-* | *-* | *-* | *-* | *-* | *-* | *-* |
| 785 | G785 | *Japonica* | Hap-1 | 40 | 38 | 34 | 34 | 45 | 40 | 40 | 35 | 41 | 60 |
| 786 | G786 | *Indica* | *-* | *-* | *-* | *-* | *-* | *-* | *-* | *-* | *-* | *-* | *-* |
| 787 | G787 | *Japonica* | *-* | 30 | 25 | 35 | 35 | 35 | 40 | 30 | 25 | 40 | 35 |
| 788 | G788 | *Indica* | Hap-1 | 30 | 28 | 20 | 20 | 23 | 33 | 28 | 28 | 30 | 34 |
| 789 | G789 | *Indica* | Hap-4 | *-* | *-* | *-* | *-* | *-* | *-* | *-* | *-* | *-* | *-* |
| 790 | G790 | *Indica* | Hap-4 | 40 | 23 | 35 | 35 | 33 | 30 | 35 | 40 | 41 | 40 |
| 791 | G791 | *Indica* | *-* | 55 | 55 | 45 | 45 | 52 | 35 | 40 | 35 | 45 | 40 |
| 792 | G792 | *Japonica* | *-* | 0 | 0 | 0 | 0 | 0 | 0 | 0 | 0 | 0 | 0 |
| 793 | G793 | *Indica* | Hap-1 | 42 | 28 | 25 | 25 | 28 | 35 | 40 | 36 | 40 | 30 |
| 794 | G794 | *Indica* | Hap-1 | 24 | 25 | 20 | 20 | 25 | 30 | 25 | 30 | 40 | 35 |
| 795 | G795 | *Indica* | Hap-4 | 48 | 62 | 68 | 68 | 70 | 70 | 65 | 58 | 70 | 58 |
