# Supplementary material for: Dissection of genetic architecture for tiller angle in rice ( Oryza sativa . L) by multiple genome-wide association analyses
Source: PeerJ journal article supplement (doi:10.7717/peerj.12674), 2022-03-10
Supplement: S-Table-4.docx [file S-Table-4.docx]

| **Supplementary Table 4: Summary of varieties in high-low pools.** | | | | | | | | |
| --- | --- | --- | --- | --- | --- | --- | --- | --- |
| Sr. No. | Indica sub-population | | | | Japonica sub-population | | | |
|  | High pool | Tiller angle | Low pool | Tiller angle | High pool | Tiller angle | Low pool | Tiller angle |
| 1 | CH1273 | 82.70 | CX69 | 21.90 | CX60 | 69.50 | CX500 | 20.10 |
| 2 | CX414 | 79.10 | CX123 | 22.00 | CX54 | 62.80 | CX316 | 20.80 |
| 3 | CX87 | 75.70 | CX261 | 22.20 | CX67 | 59.00 | CX360 | 21.30 |
| 4 | CH1260 | 74.10 | CX341 | 23.10 | CH1134 | 57.90 | CX224 | 22.90 |
| 5 | CH1099 | 73.30 | CX349 | 23.80 | CX113 | 57.70 | CX166 | 23.10 |
| 6 | CX255 | 68.90 | CH1028 | 24.00 | CX399 | 57.67 | CX293 | 23.30 |
| 7 | CH1272 | 68.40 | CX362 | 24.20 | CH1014 | 57.40 | CX306 | 26.30 |
| 8 | CX97 | 68.20 | CX28 | 25.40 | CX329 | 56.90 | CH1257 | 26.40 |
| 9 | CX466 | 66.30 | CH1165 | 25.60 | CX365 | 55.40 | CH1192 | 27.00 |
| 10 | CX416 | 65.50 | CX467 | 26.80 | CX267 | 55.30 | CX340 | 27.10 |
| 11 | CH1041 | 65.40 | CX268 | 26.90 | CH1223 | 55.30 | CX231 | 27.80 |
| 12 | CH1079 | 64.70 | CX68 | 26.90 | CX116 | 54.70 | CH1179 | 27.90 |
| 13 | CH1155 | 64.60 | CH1094 | 27.20 | CX27 | 54.00 | CH1241 | 28.60 |
| 14 | CX117 | 64.10 | CH1160 | 27.20 | CX295 | 52.80 | CH1247 | 28.70 |
| 15 | CH1275 | 63.20 | CX232 | 27.30 | CH1266 | 52.00 | CH1238 | 28.80 |
| 16 | CH1161 | 63.00 | CX219 | 27.50 | CX26 | 51.90 | CH1296 | 28.90 |
| 17 | CH1293 | 62.60 | CX254 | 27.50 | CX29 | 51.30 | CH1006 | 29.10 |
| 18 | CH1252 | 61.40 | CH1201 | 27.70 | CX12 | 51.10 | CX505 | 29.20 |
| 19 | CX328 | 61.30 | CX319 | 27.90 | CX428 | 51.10 | CH1117 | 29.20 |
| 20 | CX481 | 61.20 | CX169 | 27.90 | CX395 | 51.00 | CX376 | 29.30 |
